# Supplementary material for: Genome-Wide Association Study of Multiplex Schizophrenia Pedigrees
Source: Atypon-hosted journal article supplement (doi:10.1176/appi.ajp.2012.11091423), 2012-09-01
Supplement: appi.ajp.2012.11091423_ds001.pdf [file appi.ajp.2012.11091423_ds001.pdf]

## Data Supplement

### Levinson et al., Genome-wide Association Study of Multiplex Schizophrenia Pedigrees

|                                                                                        |     |
|----------------------------------------------------------------------------------------|-----|
| Figure S1: Ancestry groups defined by Principal Components Analysis                    | S2  |
| Figure S2: Q-Q Plots for European-ancestry (EUR) and ALL families                      | S3  |
| Figure S3: GWAS results for all 633 families                                           | S4  |
| Table S1: All SNPs with $P < 0.0001$ (European-ancestry families)                      | S5  |
| Table S2: SNP association results in all families (in or within 50kb of genes)         | S8  |
| Table S3: Results of European-ancestry polygenic score analysis                        | S9  |
| Table S4: PGC GWAS top SNPs and consistency of direction of effect in the family study | S10 |
| Summary of pathway-based analyses (ALIGATOR)                                           | S12 |
| Table S5a: ALIGATOR analysis of the total number of “significant” pathways             | S13 |
| Table S5b: Top pathway results                                                         | S13 |
| Table S6: Genes with SIMES-corrected $P < 0.05$ in the 13 pathways listed in Table S5b | S14 |
| Table S7: Functional annotation of genes with $\geq 1$ SNP with $P < 0.0001$           | S16 |
| Supplementary Methods for Candidate CNV Analyses                                       | S18 |
| Table S8: Candidate CNVs                                                               | S21 |
| Table S9: Functional annotation of genes in candidate CNVs                             | S23 |
| Table S10: regions excluded from CNV analyses                                          | S26 |
| Supplementary author list: Schizophrenia Psychiatric GWAS Consortium authors           | S28 |
| Supplementary References                                                               | S32 |

Figure S1: Ancestry groups defined by Principal Components Analysis

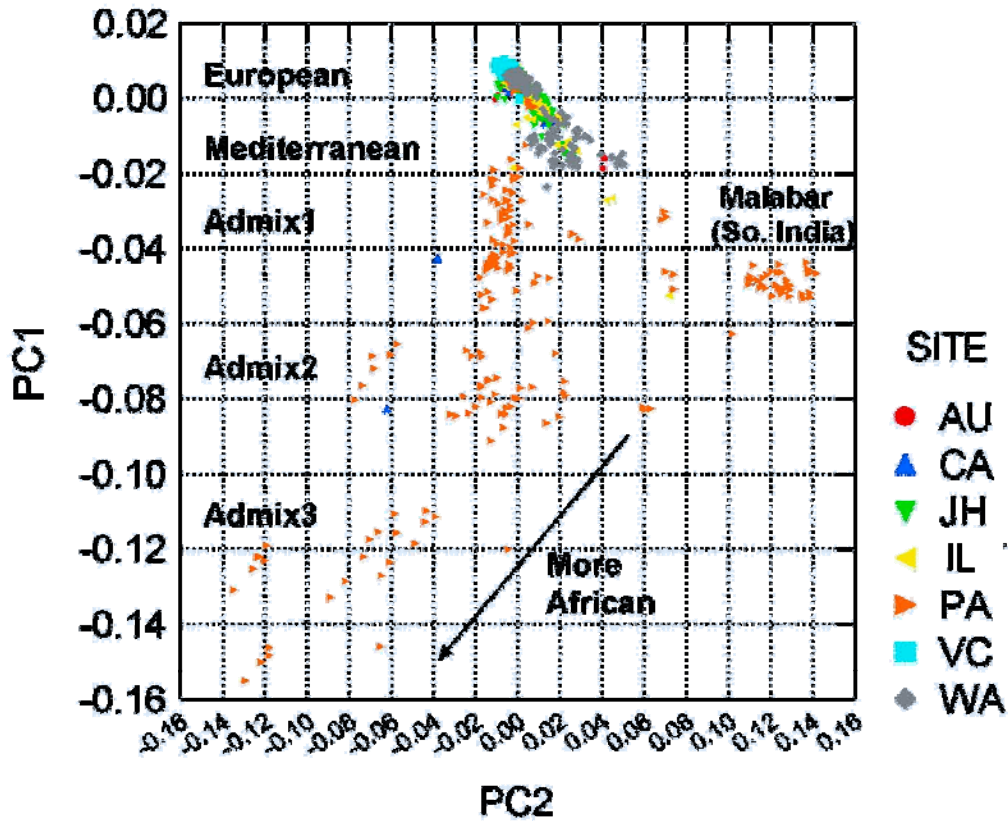

Each symbol represents one subject from the family-based GWAS (see main text, Table 1), plotted according to the first two Principal Component scores from an EIGENSTRAT analysis (1) of 55,010 autosomal SNPs with low pairwise linkage disequilibrium. Six ancestry groups were formed as shown. Each ancestry group was analyzed separately, so that the allele frequencies used by TRANSMIT or UNPHASED (in addition to the family's data) to estimate non-transmitted parental alleles would reflect the appropriate ancestral background. The primary SNP analysis included only European-ancestry families, while the all-family analysis included all six groups (with expected and observed counts of transmitted alleles combined across groups).

**Figure S2: Q-Q Plots for European-ancestry (EUR) and ALL families**

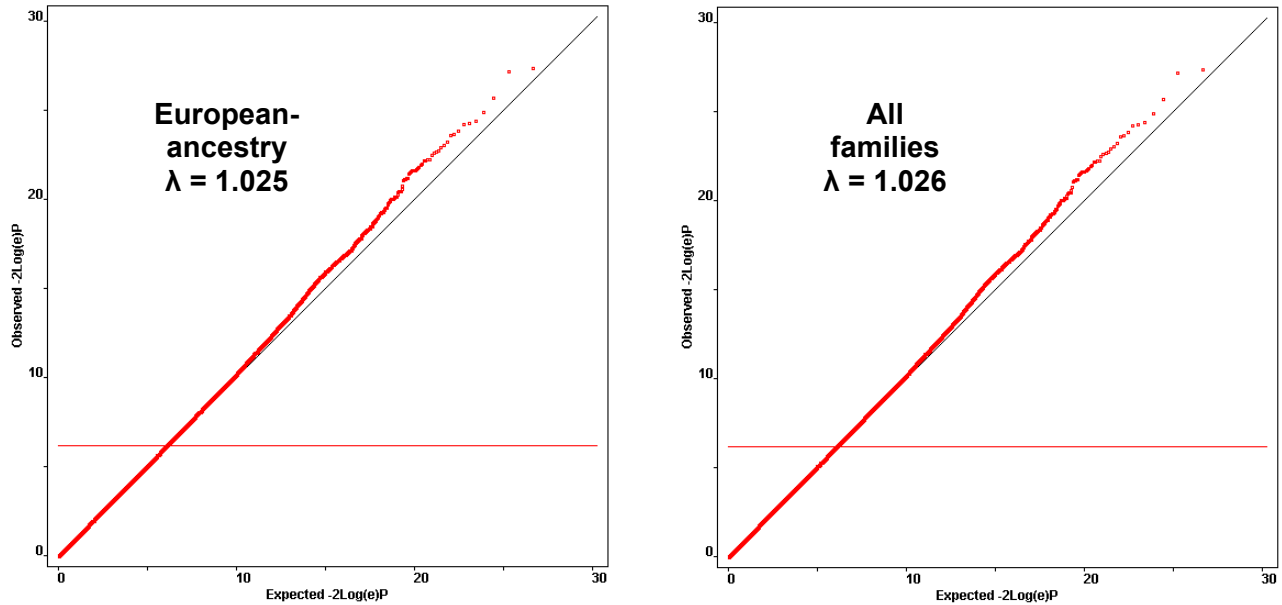

Shown are quantile-quantile plots for whole-genome SNP analyses of European-ancestry and of all families, generated by WGAViewer

(<http://people.chgv.lsrc.duke.edu/~dg48/WGAViewer/download.php>) (2). Lambda values were computed by dividing the median chi-square value for all SNPs (544,131 for European-ancestry, 541,499 for all families) by the expected value of the chi-square distribution with 1 df under the null hypothesis. 95% of values lie below the red horizontal lines.

Figure S3: GWAS results for all 631 families

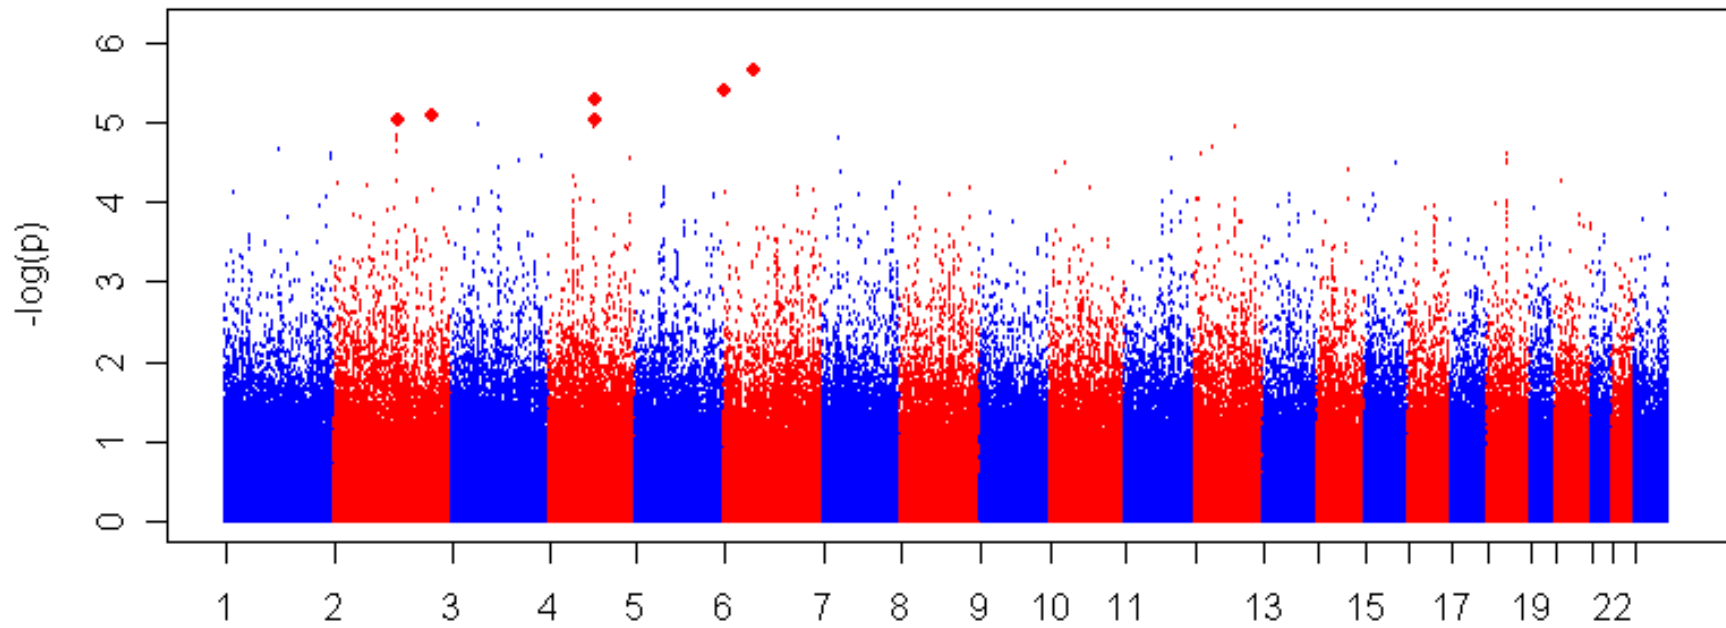

Each dot represents the  $-\log(P)$  value of one SNP in the GWAS analysis of all ancestries.  $P$ -values  $< 10^{-5}$  are represented by large diamonds. Chromosomes are shown on the X axis.

**Table S1: All SNPs with P < 0.0001 (European-ancestry families)**

| SNP        | LOC            | Allele 1 total counts |       |      |      | Allele 2 total counts |       |      |      | T from het parents |       | OR    | P-value | Genes(+/-50kb)                                                                               |
|------------|----------------|-----------------------|-------|------|------|-----------------------|-------|------|------|--------------------|-------|-------|---------|----------------------------------------------------------------------------------------------|
|            |                | A1                    | Frq   | T    | NT   | A2                    | Frq   | T    | NT   | A1                 | A2    |       |         |                                                                                              |
| rs10429924 | chr1:242457187 | T                     | 0.071 | 130  | 213  | C                     | 0.929 | 2208 | 2125 | 118.2              | 190.7 | 0.620 | 1.3E-06 |                                                                                              |
| rs3847375  | chr10:21607571 | A                     | 0.143 | 282  | 389  | C                     | 0.857 | 2056 | 1949 | 233.9              | 340.4 | 0.687 | 1.4E-06 |                                                                                              |
| rs12210050 | chr6:420489    | T                     | 0.227 | 565  | 459  | C                     | 0.773 | 1763 | 1869 | 445.1              | 371.7 | 1.197 | 2.9E-06 | EXOC2,9648                                                                                   |
| rs12426725 | chr12:80367259 | A                     | 0.152 | 308  | 411  | G                     | 0.848 | 2030 | 1927 | 254.1              | 347.9 | 0.731 | 4.2E-06 | PPFIA2,within                                                                                |
| rs16869652 | chr6:33959151  | A                     | 0.088 | 239  | 163  | G                     | 0.912 | 2099 | 2175 | 221.1              | 152.6 | 1.448 | 5.4E-06 |                                                                                              |
| rs1170612  | chr2:124699526 | T                     | 0.225 | 593  | 481  | C                     | 0.775 | 1745 | 1857 | 475.1              | 339.3 | 1.400 | 5.9E-06 | CNTNAP5,within                                                                               |
| rs2726807  | chr4:183374392 | T                     | 0.350 | 887  | 761  | C                     | 0.650 | 1451 | 1577 | 599.9              | 464.5 | 1.291 | 5.9E-06 |                                                                                              |
| rs16934812 | chr12:29763585 | G                     | 0.126 | 331  | 248  | T                     | 0.874 | 2003 | 2086 | 294.0              | 219.6 | 1.339 | 7.2E-06 | TMTC1,within                                                                                 |
| rs1170611  | chr2:124698947 | G                     | 0.227 | 597  | 486  | T                     | 0.773 | 1741 | 1852 | 476.6              | 343.8 | 1.386 | 8.0E-06 | CNTNAP5,within                                                                               |
| rs2048485  | chr18:40344665 | C                     | 0.145 | 291  | 390  | T                     | 0.855 | 2045 | 1946 | 241.8              | 337.8 | 0.716 | 8.2E-06 |                                                                                              |
| rs11082399 | chr18:40364087 | G                     | 0.163 | 334  | 435  | A                     | 0.837 | 2004 | 1903 | 271.5              | 367.8 | 0.738 | 9.7E-06 |                                                                                              |
| rs12545451 | chr8:16218065  | C                     | 0.041 | 70   | 132  | T                     | 0.959 | 2268 | 2206 | 66.1               | 116.1 | 0.570 | 1.1E-05 |                                                                                              |
| rs9759759  | chr4:101792711 | C                     | 0.130 | 263  | 359  | A                     | 0.870 | 2075 | 1979 | 223.6              | 304.6 | 0.734 | 1.1E-05 |                                                                                              |
| rs906600   | chr4:101815546 | A                     | 0.129 | 261  | 356  | C                     | 0.871 | 2077 | 1982 | 222.1              | 303.0 | 0.733 | 1.3E-05 |                                                                                              |
| rs17011040 | chr2:124660578 | T                     | 0.222 | 587  | 479  | G                     | 0.778 | 1745 | 1853 | 472.2              | 333.0 | 1.418 | 1.3E-05 | CNTNAP5,within                                                                               |
| rs1921044  | chr12:80240357 | C                     | 0.239 | 509  | 622  | A                     | 0.761 | 1829 | 1716 | 375.1              | 476.3 | 0.788 | 1.3E-05 | PPFIA2,within                                                                                |
| rs12511372 | chr4:45811189  | G                     | 0.500 | 1229 | 1106 | A                     | 0.500 | 1107 | 1230 | 643.8              | 524.2 | 1.228 | 1.4E-05 | GABRG1,within, and GABRA2 in cluster                                                         |
| rs7662743  | chr4:45871585  | A                     | 0.499 | 1226 | 1103 | G                     | 0.501 | 1112 | 1235 | 644.5              | 524.5 | 1.229 | 1.6E-05 |                                                                                              |
| rs3197999  | chr3:49696536  | T                     | 0.298 | 747  | 628  | C                     | 0.702 | 1587 | 1706 | 539.6              | 437.1 | 1.235 | 1.6E-05 | BSN,12550; APEH,598; MST1,within;<br>RNF123,-5457; AMIGO3,33432;<br>GMPPB,37399; IHPK1,40195 |
| rs1529299  | chr2:124658849 | C                     | 0.222 | 587  | 480  | A                     | 0.778 | 1751 | 1858 | 471.6              | 336.4 | 1.402 | 1.6E-05 | CNTNAP5,within                                                                               |
| rs13093713 | chr3:140959282 | G                     | 0.334 | 809  | 701  | A                     | 0.666 | 1525 | 1633 | 549.2              | 488.6 | 1.124 | 1.6E-05 |                                                                                              |
| rs10927166 | chr1:242449321 | G                     | 0.146 | 299  | 402  | A                     | 0.854 | 2037 | 1934 | 249.4              | 332.0 | 0.751 | 1.8E-05 |                                                                                              |
| rs2216959  | chr2:204892416 | G                     | 0.186 | 491  | 389  | A                     | 0.814 | 1847 | 1949 | 410.5              | 296.0 | 1.387 | 1.9E-05 |                                                                                              |
| rs954794   | chr18:40335923 | T                     | 0.138 | 279  | 372  | C                     | 0.862 | 2059 | 1966 | 234.3              | 322.9 | 0.726 | 2.0E-05 |                                                                                              |
| rs4716801  | chr7:157381124 | G                     | 0.462 | 1151 | 1022 | A                     | 0.538 | 1185 | 1314 | 652.2              | 509.0 | 1.281 | 2.1E-05 | PTPRN2,within                                                                                |
| rs11902121 | chr2:124665055 | G                     | 0.220 | 580  | 475  | A                     | 0.780 | 1754 | 1859 | 466.9              | 334.6 | 1.395 | 2.1E-05 | CNTNAP5,within                                                                               |
| rs1357262  | chr12:80372931 | A                     | 0.217 | 458  | 565  | G                     | 0.783 | 1876 | 1769 | 347.7              | 446.6 | 0.779 | 2.2E-05 | PPFIA2,within                                                                                |
| rs7805806  | chr7:20693853  | G                     | 0.123 | 334  | 250  | A                     | 0.877 | 2004 | 2088 | 298.9              | 203.8 | 1.467 | 2.2E-05 | ABCB5,within                                                                                 |
| rs12239401 | chr1:235261146 | T                     | 0.443 | 953  | 1080 | C                     | 0.557 | 1383 | 1256 | 495.2              | 657.5 | 0.753 | 2.2E-05 | RYR2,-11178                                                                                  |
| rs6433323  | chr2:172581306 | G                     | 0.381 | 963  | 842  | A                     | 0.619 | 1375 | 1496 | 623.6              | 479.2 | 1.301 | 2.3E-05 | HAT1,24460; MAP1D,within                                                                     |

|            |                |   |       |      |      |   |       |      |      |       |       |       |         |                                                         |
|------------|----------------|---|-------|------|------|---|-------|------|------|-------|-------|-------|---------|---------------------------------------------------------|
| rs10502829 | chr18:40289840 | A | 0.118 | 234  | 322  | C | 0.882 | 2104 | 2016 | 201.5 | 284.5 | 0.708 | 2.3E-05 |                                                         |
| rs7653963  | chr4:101757162 | A | 0.123 | 250  | 341  | C | 0.877 | 2088 | 1997 | 214.6 | 290.0 | 0.740 | 2.4E-05 |                                                         |
| rs1397988  | chr18:40276800 | T | 0.117 | 233  | 320  | G | 0.883 | 2103 | 2016 | 200.8 | 283.3 | 0.709 | 2.7E-05 |                                                         |
| rs1000933  | chr12:80342954 | C | 0.241 | 513  | 622  | T | 0.759 | 1825 | 1716 | 377.3 | 477.7 | 0.790 | 2.7E-05 | PPFIA2,within                                           |
| rs10784514 | chr12:64739146 | C | 0.327 | 830  | 722  | T | 0.673 | 1508 | 1616 | 579.8 | 449.4 | 1.290 | 2.8E-05 |                                                         |
| rs12606712 | chr18:40225197 | A | 0.114 | 224  | 310  | G | 0.886 | 2102 | 2016 | 193.7 | 276.5 | 0.700 | 2.8E-05 |                                                         |
| rs7305426  | chr12:12047589 | A | 0.442 | 1088 | 970  | C | 0.558 | 1248 | 1366 | 632.1 | 520.0 | 1.216 | 2.8E-05 |                                                         |
| rs1037231  | chr3:85845797  | A | 0.417 | 913  | 1038 | G | 0.583 | 1421 | 1296 | 506.2 | 629.0 | 0.805 | 3.3E-05 | CADM2,-12524                                            |
| rs3892156  | chr16:48877496 | A | 0.253 | 659  | 552  | G | 0.747 | 1669 | 1776 | 509.5 | 371.3 | 1.372 | 3.7E-05 | ADCY7,-1827; BRD7,32945                                 |
| rs2396465  | chr2:228234344 | G | 0.098 | 267  | 198  | A | 0.902 | 2071 | 2140 | 244.6 | 168.1 | 1.456 | 3.8E-05 | DKFZp547H025,-28212; SLC19A3,23825                      |
| rs6749984  | chr2:124156863 | G | 0.058 | 99   | 161  | A | 0.942 | 2223 | 2161 | 91.3  | 160.5 | 0.569 | 3.9E-05 |                                                         |
| rs6549051  | chr3:85823124  | C | 0.415 | 911  | 1035 | T | 0.585 | 1427 | 1303 | 507.7 | 627.8 | 0.809 | 3.9E-05 | CADM2,-35197                                            |
| rs1881302  | chr12:39267898 | G | 0.084 | 230  | 168  | T | 0.916 | 2108 | 2170 | 213.5 | 146.0 | 1.463 | 4.0E-05 |                                                         |
| rs534459   | chr4:45951562  | T | 0.431 | 1075 | 957  | C | 0.569 | 1261 | 1379 | 641.8 | 503.7 | 1.274 | 4.3E-05 | GABRA2,within                                           |
| rs572227   | chr4:45946150  | A | 0.425 | 1059 | 942  | G | 0.575 | 1277 | 1394 | 637.4 | 504.3 | 1.264 | 4.5E-05 | GABRA2,188                                              |
| rs12565770 | chr1:19427647  | A | 0.116 | 229  | 312  | G | 0.884 | 2109 | 2026 | 197.6 | 281.8 | 0.701 | 4.5E-05 | UBR4,-18314; KIAA0090,within; MRTO4,-23014; AFAR3,37415 |
| rs294580   | chr5:162946628 | T | 0.331 | 837  | 719  | C | 0.669 | 1501 | 1619 | 581.0 | 454.2 | 1.279 | 4.5E-05 |                                                         |
| rs488447   | chr4:45887802  | G | 0.422 | 1050 | 936  | A | 0.578 | 1286 | 1400 | 634.9 | 504.4 | 1.259 | 4.6E-05 |                                                         |
| rs11899935 | chr2:124651419 | T | 0.223 | 587  | 485  | C | 0.777 | 1751 | 1853 | 470.8 | 339.1 | 1.389 | 4.8E-05 | CNTNAP5,within                                          |
| rs1851185  | chr2:212235974 | T | 0.236 | 593  | 490  | C | 0.764 | 1745 | 1848 | 462.8 | 380.3 | 1.217 | 4.8E-05 | ERBB4,within                                            |
| rs522636   | chr4:45922604  | C | 0.425 | 1059 | 943  | T | 0.575 | 1279 | 1395 | 636.9 | 505.7 | 1.259 | 4.8E-05 | GABRA2,23734                                            |
| rs1456614  | chr18:40160422 | T | 0.144 | 379  | 298  | C | 0.856 | 1959 | 2040 | 330.8 | 244.1 | 1.355 | 4.8E-05 |                                                         |
| rs12321966 | chr12:8592432  | T | 0.094 | 264  | 196  | G | 0.906 | 2072 | 2140 | 243.5 | 153.6 | 1.585 | 5.1E-05 | CLEC4D,26205; CLEC4E,-7607                              |
| rs1540416  | chr8:16256536  | G | 0.052 | 93   | 156  | A | 0.948 | 2245 | 2182 | 86.7  | 142.5 | 0.609 | 5.3E-05 |                                                         |
| rs4805453  | chr19:34814743 | C | 0.421 | 1050 | 927  | T | 0.579 | 1286 | 1409 | 635.7 | 503.2 | 1.263 | 5.3E-05 | POP4,16196; PLEKHF1,-33423                              |
| rs534787   | chr4:45927453  | C | 0.425 | 1059 | 943  | T | 0.575 | 1279 | 1395 | 636.7 | 506.0 | 1.258 | 5.4E-05 | GABRA2,18885                                            |
| rs6901207  | chr6:3798905   | G | 0.443 | 1110 | 995  | A | 0.557 | 1228 | 1343 | 650.3 | 503.8 | 1.291 | 5.6E-05 | FAM50B,2355                                             |
| rs6443997  | chr3:186016225 | A | 0.058 | 106  | 156  | G | 0.942 | 2232 | 2182 | 98.0  | 159.2 | 0.616 | 6.1E-05 | VPS8,within                                             |
| rs8093196  | chr18:40367268 | G | 0.316 | 678  | 782  | T | 0.684 | 1660 | 1556 | 444.5 | 566.3 | 0.785 | 6.1E-05 |                                                         |
| rs795955   | chr12:77160181 | T | 0.403 | 883  | 993  | C | 0.597 | 1455 | 1345 | 503.7 | 621.1 | 0.811 | 6.2E-05 | NAV3,29260                                              |
| rs10507070 | chr12:94873188 | A | 0.172 | 451  | 359  | G | 0.828 | 1885 | 1977 | 381.6 | 285.1 | 1.338 | 6.3E-05 | CCDC38,-12629; AMDHD1,within; HAL,18084; LTA4H,45553    |
| rs7179849  | chr15:22589304 | T | 0.182 | 383  | 475  | C | 0.818 | 1955 | 1863 | 305.7 | 389.8 | 0.784 | 6.6E-05 | SNRPN,-30582                                            |
| rs1432655  | chr5:162961360 | T | 0.473 | 1040 | 1163 | C | 0.527 | 1298 | 1175 | 515.9 | 649.9 | 0.794 | 6.7E-05 |                                                         |
| rs7612090  | chr3:85812192  | A | 0.426 | 941  | 1059 | G | 0.574 | 1397 | 1279 | 517.5 | 625.7 | 0.827 | 6.9E-05 | CADM2,-46129                                            |
| rs9883807  | chr3:85820336  | A | 0.426 | 941  | 1059 | C | 0.574 | 1397 | 1279 | 517.5 | 625.6 | 0.827 | 7.0E-05 | CADM2,-37985                                            |
| rs1391168  | chr4:45809916  | G | 0.480 | 1065 | 1178 | A | 0.520 | 1267 | 1154 | 527.7 | 636.4 | 0.829 | 7.0E-05 | GABRG1,within                                           |
| rs502038   | chr4:45975075  | G | 0.426 | 1064 | 950  | T | 0.574 | 1274 | 1388 | 640.3 | 502.9 | 1.273 | 7.0E-05 | GABRA2,within                                           |
| rs6927764  | chr6:133518471 | G | 0.206 | 522  | 433  | A | 0.794 | 1816 | 1905 | 422.6 | 342.9 | 1.232 | 7.1E-05 |                                                         |

|            |                |   |       |      |      |   |       |      |      |       |       |       |         |                                            |
|------------|----------------|---|-------|------|------|---|-------|------|------|-------|-------|-------|---------|--------------------------------------------|
| rs7180015  | chr15:85305969 | G | 0.087 | 162  | 226  | A | 0.913 | 2176 | 2112 | 144.4 | 225.8 | 0.640 | 7.1E-05 | AGBL1,within                               |
| rs4695140  | chr4:45670100  | C | 0.399 | 1003 | 890  | T | 0.601 | 1335 | 1448 | 630.4 | 491.1 | 1.284 | 7.2E-05 |                                            |
| rs2249112  | chr4:183378729 | T | 0.301 | 757  | 649  | C | 0.699 | 1579 | 1687 | 545.7 | 436.7 | 1.250 | 7.6E-05 |                                            |
| rs1782     | chr6:90124434  | C | 0.116 | 311  | 240  | T | 0.884 | 2017 | 2088 | 279.7 | 197.7 | 1.415 | 7.7E-05 | GABRR2,-42748; UBE2J1,-5096;<br>RRAGD,9878 |
| rs1598665  | chr18:40183207 | T | 0.144 | 378  | 298  | A | 0.856 | 1960 | 2040 | 329.7 | 246.1 | 1.340 | 7.7E-05 |                                            |
| rs2362643  | chr16:68503033 | G | 0.318 | 815  | 701  | A | 0.682 | 1523 | 1637 | 578.2 | 436.4 | 1.325 | 7.8E-05 | WWP2,within; LOC348174,-39277              |
| rs6718013  | chr2:172577431 | A | 0.442 | 1101 | 984  | G | 0.558 | 1237 | 1354 | 643.4 | 510.1 | 1.261 | 8.2E-05 | HAT1,20585; MAP1D,within                   |
| rs2211871  | chr21:38744520 | G | 0.092 | 242  | 179  | T | 0.908 | 2094 | 2157 | 222.4 | 166.6 | 1.335 | 8.3E-05 | ERG,within                                 |
| rs7673537  | chr4:45883535  | T | 0.509 | 1245 | 1134 | C | 0.491 | 1093 | 1204 | 639.5 | 529.1 | 1.209 | 8.4E-05 |                                            |
| rs2890851  | chr15:35347654 | G | 0.399 | 986  | 877  | A | 0.601 | 1352 | 1461 | 614.6 | 506.2 | 1.214 | 8.5E-05 |                                            |
| rs1008927  | chr21:38746043 | C | 0.091 | 238  | 175  | A | 0.909 | 2090 | 2153 | 218.9 | 164.4 | 1.331 | 8.6E-05 | ERG,within                                 |
| rs4925449  | chr22:47486086 | A | 0.084 | 170  | 237  | G | 0.916 | 2166 | 2099 | 153.4 | 207.6 | 0.739 | 8.8E-05 | FAM19A5,within                             |
| rs1591956  | chr13:65207677 | A | 0.415 | 1021 | 908  | G | 0.585 | 1317 | 1430 | 617.9 | 517.5 | 1.194 | 8.8E-05 |                                            |
| rs175      | chr7:25000316  | C | 0.466 | 1142 | 1031 | A | 0.534 | 1194 | 1305 | 635.4 | 527.1 | 1.206 | 9.2E-05 | OSBPL3,-14031                              |
| rs10760120 | chr9:99908721  | G | 0.468 | 1024 | 1143 | A | 0.532 | 1308 | 1189 | 514.3 | 646.8 | 0.795 | 9.3E-05 | NANS,23543; TRIM14,within; CORO2A,17575    |
| rs1433781  | chr5:162966587 | A | 0.473 | 1037 | 1158 | G | 0.527 | 1301 | 1180 | 514.8 | 650.7 | 0.791 | 9.3E-05 |                                            |
| rs632608   | chr11:81579961 | C | 0.379 | 947  | 828  | A | 0.621 | 1391 | 1510 | 612.0 | 488.0 | 1.254 | 9.4E-05 |                                            |
| rs10489577 | chr1:231021449 | C | 0.036 | 103  | 61   | T | 0.964 | 2235 | 2277 | 100.0 | 62.3  | 1.604 | 9.5E-05 | KIAA1383,8734                              |
| rs921383   | chr11:77388489 | A | 0.470 | 1172 | 1057 | G | 0.530 | 1162 | 1277 | 656.4 | 506.4 | 1.296 | 9.8E-05 | INTS4,-5124; KCTD14,15919                  |

Shown are association test results for all SNPs with  $P < 0.0001$  in the EUR analysis of 583 families. A1=allele 1. Frq = allele frequency in founders. T = transmitted alleles. NT = estimated count of alleles not transmitted by parents. OR=odds ratio. Transmissions from heterozygous parents have been estimated as described in the main text.

**Table S2: SNP association results in all families (in or within 50kb of genes)**

| SNP        | LOC             | Allele 1 total counts |      |      | Allele 2 total counts |      |      | T from het parents |       | OR   | P-value  | SNPs | Genew (within 50kb)                                                               |
|------------|-----------------|-----------------------|------|------|-----------------------|------|------|--------------------|-------|------|----------|------|-----------------------------------------------------------------------------------|
|            |                 | A1                    | T1   | NT1  | A2                    | T1   | NT2  | T1                 | T2    |      |          |      |                                                                                   |
| rs12210050 | chr6:420489     | T                     | 582  | 476  | C                     | 1940 | 2046 | 459.7              | 390.6 | 1.18 | 4.01E-06 | 1    | EXOC2,9648                                                                        |
| rs1170612  | chr2:124699526  | T                     | 648  | 533  | C                     | 1962 | 2077 | 518.7              | 377.3 | 1.37 | 9.15E-06 | 6    | CNTNAP5                                                                           |
| rs3197999  | chr3:49696536   | T                     | 805  | 676  | C                     | 1801 | 1930 | 587.0              | 471.9 | 1.24 | 1.10E-05 | 1    | BSN,12550; APEH,598; MST1; RNF123,-5457; AMIGO3,33432; GMPPB,37399; IHPK1,40195   |
| rs12426725 | chr12:80367259  | A                     | 358  | 461  | G                     | 2252 | 2149 | 293.2              | 389.7 | 0.75 | 1.13E-05 | 1    | PPFIA2                                                                            |
| rs175      | chr7:25000316   | C                     | 1273 | 1144 | A                     | 1335 | 1464 | 711.9              | 579.6 | 1.23 | 1.58E-05 | 1    | OSBPL3,-14031                                                                     |
| rs16934812 | chr12:29763585  | G                     | 354  | 271  | T                     | 2222 | 2305 | 314.9              | 235.6 | 1.34 | 2.01E-05 | 1    | TMTC1                                                                             |
| rs1574509  | chr1:114432019  | T                     | 1190 | 1063 | C                     | 1418 | 1545 | 694.5              | 583.4 | 1.19 | 2.19E-05 | 1    | SYT6,1417                                                                         |
| rs6443997  | chr3:186016225  | A                     | 135  | 196  | G                     | 2475 | 2414 | 120.0              | 194.3 | 0.62 | 2.70E-05 | 1    | VPS8                                                                              |
| rs2656193  | chr11:98837693  | A                     | 913  | 1036 | G                     | 1697 | 1574 | 543.3              | 667.0 | 0.81 | 2.94E-05 | 2    | CNTN5                                                                             |
| rs7180015  | chr15:85305969  | G                     | 202  | 274  | A                     | 2408 | 2336 | 176.0              | 268.9 | 0.65 | 3.33E-05 | 1    | AGBL1                                                                             |
| rs1037231  | chr3:85845797   | A                     | 1028 | 1161 | G                     | 1578 | 1445 | 563.7              | 705.2 | 0.80 | 3.59E-05 | 3    | CADM2,-12524                                                                      |
| rs10225163 | chr7:27892170   | C                     | 1013 | 1138 | G                     | 1597 | 1472 | 574.6              | 677.9 | 0.85 | 4.23E-05 | 1    | JAZF1                                                                             |
| rs502038   | chr4:45975075   | G                     | 1165 | 1042 | T                     | 1445 | 1568 | 705.7              | 554.7 | 1.27 | 4.71E-05 | 1    | GABRA2                                                                            |
| rs1569604  | chr20:8456036   | T                     | 1112 | 1231 | C                     | 1488 | 1369 | 570.8              | 711.8 | 0.80 | 5.43E-05 | 1    | PLCB1                                                                             |
| rs4716801  | chr7:157381124  | G                     | 1281 | 1154 | A                     | 1327 | 1454 | 715.3              | 579.6 | 1.23 | 5.88E-05 | 1    | PTPRN2                                                                            |
| rs17086658 | chr4:56864663   | T                     | 266  | 191  | C                     | 2312 | 2387 | 246.4              | 161.6 | 1.52 | 6.36E-05 | 1    | KIAA1211; AASDH,34550                                                             |
| rs10999882 | chr10:72996346  | T                     | 1125 | 1245 | C                     | 1481 | 1361 | 593.0              | 695.7 | 0.85 | 6.53E-05 | 1    | CDH23                                                                             |
| rs32181    | chr5:61861390   | C                     | 940  | 829  | T                     | 1670 | 1781 | 645.9              | 517.8 | 1.25 | 6.66E-05 | 1    | IPO11                                                                             |
| rs2064712  | chr6:161136598  | T                     | 379  | 473  | C                     | 2231 | 2137 | 307.1              | 409.0 | 0.75 | 6.93E-05 | 1    | PLG,42261                                                                         |
| rs1851185  | chr2:212235974  | T                     | 675  | 566  | C                     | 1935 | 2044 | 515.3              | 435.1 | 1.18 | 7.21E-05 | 1    | ERBB4                                                                             |
| rs2620440  | chr7:146629226  | T                     | 582  | 483  | C                     | 2028 | 2127 | 457.9              | 358.5 | 1.28 | 7.48E-05 | 3    | CNTNAP2                                                                           |
| rs318477   | chr6:2832651    | A                     | 1263 | 1142 | G                     | 1347 | 1468 | 711.9              | 580.7 | 1.23 | 7.60E-05 | 1    | SERPINB1,-45571; SERPINB9                                                         |
| rs12565770 | chr1:19427647   | A                     | 253  | 337  | G                     | 2357 | 2273 | 219.4              | 302.9 | 0.72 | 7.78E-05 | 1    | UBR4,-18314; KIAA0090; MRTO4,-23014; AFAR3,37415                                  |
| rs247235   | chr5:61775220   | C                     | 943  | 833  | T                     | 1663 | 1773 | 644.0              | 521.6 | 1.23 | 7.79E-05 | 3    | DIMT1L,-39735; IPO11                                                              |
| rs1252216  | chr8:85639791   | G                     | 663  | 560  | A                     | 1943 | 2046 | 520.2              | 400.3 | 1.30 | 8.23E-05 | 1    | RALYL                                                                             |
| rs12239401 | chr1:235261146  | T                     | 1043 | 1167 | C                     | 1565 | 1441 | 558.5              | 708.6 | 0.79 | 8.60E-05 | 1    | RYR2,-11178                                                                       |
| rs795955   | chr12:77160181  | T                     | 1002 | 1113 | C                     | 1606 | 1495 | 569.0              | 683.3 | 0.83 | 9.16E-05 | 1    | NAV3,29260                                                                        |
| rs11695630 | chr2:172559798  | C                     | 755  | 873  | T                     | 1851 | 1733 | 497.2              | 612.9 | 0.81 | 9.19E-05 | 1    | HAT1,2952; MAP1D,-13251                                                           |
| rs9855505  | chr3:49767162   | G                     | 1423 | 1295 | T                     | 1187 | 1315 | 709.3              | 592.2 | 1.20 | 9.31E-05 | 1    | RNF123,33196; AMIGO3,-35035; GMPPB,-30774; IHPK1; LOC389118,43506; C3orf54,-48528 |
| rs939207   | chr4:68850266   | A                     | 289  | 215  | G                     | 2319 | 2393 | 263.4              | 200.0 | 1.32 | 9.37E-05 | 1    | YTHDC1,8433                                                                       |
| rs12321966 | chr12:8592432   | T                     | 271  | 204  | G                     | 2307 | 2374 | 250.1              | 163.4 | 1.53 | 9.41E-05 | 1    | CLEC4D,26205; CLEC4E,-7607                                                        |
| rs11063077 | chr12:4293296   | G                     | 626  | 730  | A                     | 1982 | 1878 | 445.4              | 551.4 | 0.81 | 9.43E-05 | 1    | CCND2,8519; C12orf5,-7323                                                         |
| rs731716   | chr11:124764510 | A                     | 1173 | 1285 | G                     | 1431 | 1319 | 569.2              | 703.9 | 0.81 | 9.69E-05 | 1    | PKNOX2                                                                            |

Shown are association test results for all SNPs with  $P < 0.0001$  in the all-family analysis of 631 families. See Table S1 legend for abbreviations. SNPs with  $P < 1.0E-05$  were also observed in non-genic regions including chr6:33959151, chr4: 101792711-101815546, and chr2:204892416.



**Table S3: Results of European-ancestry polygenic score analysis (family study results predicting Psychiatric GWAS Consortium case-control status)**

| Threshold  | P-value for effect of polygenic score (accounting for covariates) | R <sup>2</sup> difference (R <sup>2</sup> for model with score+covariates, minus R <sup>2</sup> for model with only covariates) | N SNPs |
|------------|-------------------------------------------------------------------|---------------------------------------------------------------------------------------------------------------------------------|--------|
| 0.0001     | 0.299                                                             | 0.00006                                                                                                                         | 35     |
| 0.001      | 0.058                                                             | 0.00019                                                                                                                         | 311    |
| 0.01       | 4.9E-05                                                           | 0.00089                                                                                                                         | 2480   |
| 0.05       | 1.1E-12                                                           | 0.00276                                                                                                                         | 10411  |
| 0.1        | 1.2E-14                                                           | 0.00324                                                                                                                         | 19152  |
| <b>0.2</b> | <b>1.0E-17</b>                                                    | <b>0.00400</b>                                                                                                                  | 34937  |
| 0.3        | 2.3E-15                                                           | 0.00342                                                                                                                         | 49057  |
| 0.4        | 5.0E-15                                                           | 0.00334                                                                                                                         | 61852  |
| 0.5        | 2.9E-14                                                           | 0.00315                                                                                                                         | 73530  |
| 1          | 2.1E-14                                                           | 0.00319                                                                                                                         | 112869 |

Shown in the table are the details of results that are illustrated in the main text in Figure 3 (see also the main text and Figure 3 legend). The “R<sup>2</sup> difference” is the variance in case-control status in the PGC GWAS sample attributable to polygenic scores that were computed based on family-study association results (see below), in a logistic regression model predicting PGC case-control status with polygenic scores plus covariates designating 17 PGC study samples (so that each study’s controls would be contrasted with its controls, because technical factors and ancestral origins were related to study), plus principal component scores for each PGC subject reflecting ancestral origins (computed across the entire PGC sample). The Nagelkerke’s R<sup>2</sup> for covariates-only was subtracted from the R<sup>2</sup> for the full model. Covariates alone explained an R<sup>2</sup> of ~ 0.16 (which is why correcting for them is critical in all analyses).

The analysis was repeated 10 times. The last row includes all 112,869 SNPs, selected because they were genotyped in the family sample, were genotyped or imputed (based on HapMap 3 data, with information content >0.9) in the PGC stage 1 dataset (9,394 European-ancestry cases and 12,462 controls), with minor allele frequency > 2% in both samples, and had pairwise linkage disequilibrium (in 500-SNP windows) restricted to < 0.25; and then the SNPs meeting each other p-value threshold (col 1), e.g., the row for threshold “0.2” includes SNPs whose p-values in the family study were among the 20% best observed p-values.

The maximum effect was 0.4% of variance explained, using SNPs with the best 20% of p-values in the family study.

**Table S4: PGC GWAS top SNPs and consistency of direction of effect in the family study**

| -----Top PGC phase 1 independent SNPs----- |     |           |    |       |       |         | Best fam study proxy |           |                | PGC result for proxy |       |       |         | Fam study result |       |       |       | Same: |      |     | Corr  |
|--------------------------------------------|-----|-----------|----|-------|-------|---------|----------------------|-----------|----------------|----------------------|-------|-------|---------|------------------|-------|-------|-------|-------|------|-----|-------|
| SNP                                        | CHR | BP        | A  | FrA1  | OR    | P       | SNP                  | BP        | R <sup>2</sup> | A                    | FrA1  | OR    | P       | A                | OR    | FrA1  | P     | Strnd | Test | DIR | OR    |
| rs2252865                                  | 1   | 8345263   | TC | 0.337 | 1.104 | 4.9E-06 | rs10779702           | 8346097   | 1.000          | AG                   | 0.337 | 1.102 | 6.4E-06 | GA               | 0.964 | 0.690 | 0.609 | Y     | N    | Y   | 1.037 |
| rs1009080                                  | 1   | 30204147  | AG | 0.707 | 0.904 | 5.8E-06 |                      |           |                |                      |       |       |         | TC               | 1.065 | 0.698 | 0.414 | N     | Y    | N   | 1.065 |
| rs1625579                                  | 1   | 98275522  | TG | 0.800 | 1.142 | 5.7E-07 |                      |           |                |                      |       |       |         | CA               | 0.887 | 0.187 | 0.149 | N     | N    | Y   | 1.127 |
| rs7540658                                  | 1   | 181010828 | AC | 0.698 | 0.898 | 1.5E-05 |                      |           |                |                      |       |       |         | CA               | 1.042 | 0.335 | 0.561 | Y     | N    | Y   | 0.960 |
| rs3818802                                  | 1   | 241516504 | AG | 0.528 | 1.101 | 3.8E-06 | rs2484639            | 241528990 | 0.762          | AG                   | 0.516 | 1.098 | 7.2E-06 | GA               | 1.064 | 0.456 | 0.372 | Y     | N    | N   | 0.940 |
| rs6703335                                  | 1   | 241675590 | AG | 0.435 | 0.907 | 3.3E-06 | rs3006925            | 241676550 | 0.436          | TC                   | 0.225 | 0.895 | 1.2E-05 | TC               | 0.916 | 0.217 | 0.260 | Y     | Y    | Y   | 0.916 |
| rs11682175                                 | 2   | 57841097  | TC | 0.533 | 0.907 | 4.1E-06 |                      |           |                |                      |       |       |         | TC               | 1.072 | 0.501 | 0.278 | Y     | Y    | N   | 1.072 |
| rs17180327                                 | 2   | 180724378 | AG | 0.653 | 0.896 | 6.8E-07 |                      |           |                |                      |       |       |         | GA               | 1.025 | 0.335 | 0.714 | Y     | N    | Y   | 0.976 |
| rs17662626                                 | 2   | 193692866 | AG | 0.911 | 1.222 | 3.1E-06 |                      |           |                |                      |       |       |         | GA               | 1.022 | 0.080 | 0.859 | Y     | N    | N   | 0.978 |
| rs2675968                                  | 2   | 233444488 | TC | 0.302 | 1.110 | 2.6E-06 | rs709937             | 233452265 | 0.989          | AG                   | 0.304 | 1.104 | 9.7E-06 | TC               | 0.913 | 0.305 | 0.215 | N     | Y    | N   | 0.913 |
| rs13025591                                 | 2   | 236460082 | AC | 0.605 | 0.902 | 1.1E-06 | rs6741609            | 236442364 | 0.723          | AG                   | 0.540 | 0.922 | 7.8E-05 | GA               | 1.001 | 0.489 | 0.992 | Y     | N    | Y   | 0.999 |
| rs4624519                                  | 3   | 36837984  | TC | 0.351 | 1.102 | 6.3E-06 |                      |           |                |                      |       |       |         | TC               | 0.996 | 0.374 | 0.958 | Y     | Y    | N   | 0.996 |
| rs2239547                                  | 3   | 52830269  | TC | 0.724 | 1.117 | 2.3E-06 | rs4687657            | 52827578  | 0.988          | TG                   | 0.274 | 0.897 | 3.7E-06 | TG               | 0.889 | 0.274 | 0.118 | Y     | Y    | Y   | 1.125 |
| rs11130874                                 | 3   | 62039809  | AG | 0.792 | 1.145 | 2.1E-07 | rs191558             | 62054056  | 0.966          | AG                   | 0.207 | 0.876 | 3.2E-07 | TC               | 0.906 | 0.201 | 0.246 | N     | Y    | Y   | 1.104 |
| rs1879248                                  | 3   | 182033908 | TC | 0.731 | 1.128 | 1.3E-06 | rs9838229            | 182015945 | 1.000          | AC                   | 0.732 | 1.128 | 1.3E-06 | CA               | 1.037 | 0.243 | 0.642 | Y     | N    | N   | 0.964 |
| rs4295265                                  | 4   | 103054668 | TC | 0.339 | 1.103 | 1.1E-05 | rs2850377            | 103131182 | 0.699          | TC                   | 0.424 | 1.094 | 2.4E-05 | TC               | 0.975 | 0.454 | 0.711 | Y     | Y    | N   | 0.975 |
| rs7730479                                  | 5   | 21955293  | TC | 0.141 | 1.202 | 1.5E-05 |                      |           |                |                      |       |       |         | TC               | 1.067 | 0.147 | 0.527 | Y     | Y    | Y   | 1.067 |
| rs1433019                                  | 5   | 171917518 | AC | 0.781 | 1.125 | 3.1E-06 |                      |           |                |                      |       |       |         | CA               | 1.040 | 0.196 | 0.634 | Y     | N    | N   | 0.962 |
| rs2021722                                  | 6   | 30282110  | TC | 0.215 | 0.843 | 4.3E-11 | rs2844776            | 30279806  | 1.000          | TC                   | 0.785 | 1.186 | 5.0E-11 | GA               | 0.910 | 0.216 | 0.229 | N     | N    | Y   | 0.910 |
| rs9462875                                  | 6   | 43276095  | AG | 0.823 | 1.153 | 1.5E-06 |                      |           |                |                      |       |       |         | GA               | 1.064 | 0.161 | 0.474 | Y     | N    | N   | 0.940 |
| rs10226475                                 | 7   | 2192688   | AG | 0.605 | 1.124 | 5.1E-08 | rs12666575           | 1970947   | 0.495          | TC                   | 0.390 | 0.894 | 2.3E-07 | TC               | 1.044 | 0.384 | 0.540 | Y     | Y    | N   | 0.958 |
| rs12699131                                 | 7   | 71389252  | AG | 0.472 | 1.098 | 5.2E-06 | rs756912             | 71379733  | 0.990          | TC                   | 0.527 | 0.911 | 5.5E-06 | TC               | 0.953 | 0.503 | 0.493 | Y     | Y    | Y   | 1.049 |
| rs4415249                                  | 7   | 134347420 | AC | 0.150 | 0.874 | 4.2E-06 | rs4329203            | 134347280 | 1.000          | AC                   | 0.851 | 1.141 | 7.1E-06 | CA               | 0.886 | 0.149 | 0.186 | Y     | N    | Y   | 0.886 |
| rs10503253                                 | 8   | 4168252   | AC | 0.191 | 1.141 | 3.8E-07 |                      |           |                |                      |       |       |         | CA               | 0.976 | 0.782 | 0.771 | Y     | N    | Y   | 1.025 |
| rs10503256                                 | 8   | 4201587   | AG | 0.349 | 1.118 | 2.0E-07 |                      |           |                |                      |       |       |         | GA               | 0.911 | 0.628 | 0.197 | Y     | N    | Y   | 1.098 |
| rs500115                                   | 8   | 8672925   | TC | 0.862 | 1.152 | 5.8E-06 |                      |           |                |                      |       |       |         | GA               | 0.995 | 0.135 | 0.961 | N     | N    | Y   | 1.005 |
| rs12234997                                 | 8   | 9275118   | AG | 0.435 | 1.105 | 3.1E-06 | rs12235038           | 9274813   | 0.931          | TG                   | 0.557 | 0.909 | 6.9E-06 | TG               | 1.049 | 0.555 | 0.479 | Y     | Y    | N   | 0.953 |
| rs7004633                                  | 8   | 89829427  | AG | 0.819 | 0.858 | 1.5E-08 |                      |           |                |                      |       |       |         | GA               | 0.962 | 0.194 | 0.651 | Y     | N    | N   | 1.040 |
| rs10098073                                 | 8   | 143307411 | AC | 0.474 | 1.098 | 5.4E-06 | rs4129585            | 143310840 | 0.775          | AC                   | 0.441 | 1.094 | 1.5E-05 | TG               | 1.047 | 0.443 | 0.501 | N     | Y    | Y   | 1.047 |
| rs12352353                                 | 9   | 4733341   | AG | 0.848 | 1.161 | 6.6E-07 | rs396861             | 4733626   | 0.981          | AG                   | 0.846 | 1.160 | 7.5E-07 | GA               | 1.109 | 0.143 | 0.306 | Y     | N    | N   | 0.902 |
| rs6602217                                  | 10  | 6986269   | TC | 0.930 | 0.843 | 1.8E-05 |                      |           |                |                      |       |       |         | TC               | 0.963 | 0.925 | 0.746 | Y     | Y    | Y   | 0.963 |
| rs41441548                                 | 10  | 34190827  | AG | 0.069 | 1.245 | 2.7E-06 | rs10508791           | 34187301  | 0.465          | TC                   | 0.865 | 0.896 | 2.6E-04 | TC               | 1.010 | 0.853 | 0.910 | Y     | Y    | N   | 0.990 |
| rs16915157                                 | 10  | 62016644  | TC | 0.195 | 1.126 | 4.4E-06 | rs2068043            | 61990336  | 0.934          | AG                   | 0.185 | 1.127 | 5.4E-06 | GA               | 0.882 | 0.820 | 0.136 | Y     | N    | Y   | 1.134 |
| rs7914558                                  | 10  | 104765898 | AG | 0.414 | 0.896 | 1.6E-07 | rs4532960            | 104657396 | 0.990          | TC                   | 0.415 | 0.898 | 2.4E-07 | TC               | 0.839 | 0.413 | 0.014 | Y     | Y    | Y   | 0.839 |
| rs11191580                                 | 10  | 104896201 | TC | 0.909 | 1.227 | 2.2E-08 | rs12413409           | 104709086 | 1.000          | AG                   | 0.091 | 0.828 | 2.1E-07 | GA               | 1.122 | 0.925 | 0.357 | Y     | N    | Y   | 1.122 |
| rs11191732                                 | 10  | 105321751 | AG | 0.204 | 1.142 | 2.3E-07 |                      |           |                |                      |       |       |         | GA               | 0.810 | 0.806 | 0.014 | Y     | N    | Y   | 1.235 |
| rs1025641                                  | 10  | 128297182 | TC | 0.667 | 1.117 | 8.3E-07 |                      |           |                |                      |       |       |         | GA               | 0.935 | 0.319 | 0.349 | N     | N    | Y   | 1.070 |
| rs4356203                                  | 11  | 17116724  | AG | 0.591 | 0.905 | 1.9E-06 | rs621246             | 17160341  | 0.859          | TG                   | 0.537 | 0.930 | 3.9E-04 | TG               | 1.032 | 0.526 | 0.640 | Y     | Y    | N   | 1.032 |
| rs7938219                                  | 11  | 29159016  | AG | 0.111 | 1.159 | 5.7E-06 |                      |           |                |                      |       |       |         | GA               | 0.946 | 0.896 | 0.589 | Y     | N    | Y   | 1.057 |
| rs2509843                                  | 11  | 97630614  | AG | 0.608 | 0.901 | 1.1E-06 | rs2852034            | 97617703  | 0.895          | AC                   | 0.622 | 0.903 | 1.3E-06 | CA               | 1.102 | 0.377 | 0.169 | Y     | N    | Y   | 0.907 |
| rs11220082                                 | 11  | 124829175 | TC | 0.528 | 1.112 | 2.6E-07 | rs671789             | 124799824 | 0.480          | AC                   | 0.301 | 0.898 | 1.8E-06 | TG               | 0.974 | 0.276 | 0.726 | N     | Y    | Y   | 1.027 |
| rs548181                                   | 11  | 124966919 | AG | 0.120 | 0.832 | 2.9E-08 | rs540723             | 124994831 | 0.948          | AG                   | 0.118 | 0.841 | 1.5E-07 | TC               | 0.887 | 0.108 | 0.270 | N     | Y    | Y   | 0.887 |
| rs10894294                                 | 11  | 130335958 | AC | 0.518 | 0.911 | 6.5E-06 | rs7111478            | 130324838 | 0.960          | AG                   | 0.484 | 1.095 | 1.1E-05 | GA               | 0.978 | 0.485 | 0.737 | Y     | N    | Y   | 0.978 |

| -----Top PGC phase 1 independent SNPs----- |     |          |    |       |       |         | Best fam study proxy |          |                | PGC result for proxy |       |       |         | Fam study result |       |       |       | Same: |      |     | Corr  |
|--------------------------------------------|-----|----------|----|-------|-------|---------|----------------------|----------|----------------|----------------------|-------|-------|---------|------------------|-------|-------|-------|-------|------|-----|-------|
| SNP                                        | CHR | BP       | A  | FrA1  | OR    | P       | SNP                  | BP       | R <sup>2</sup> | A                    | FrA1  | OR    | P       | A                | OR    | FrA1  | P     | Strnd | Test | DIR | OR    |
| rs7972947                                  | 12  | 2040694  | AC | 0.220 | 0.865 | 7.8E-07 |                      |          |                |                      |       |       |         | CA               | 0.886 | 0.814 | 0.193 | Y     | N    | N   | 1.129 |
| rs4765905                                  | 12  | 2219845  | CG | 0.328 | 1.113 | 8.9E-07 | rs2159100            | 2216654  | 0.976          | TC                   | 0.327 | 1.111 | 1.5E-06 | TC               | 1.040 | 0.346 | 0.579 | Y     | Y    | Y   | 1.040 |
| rs10135277                                 | 14  | 34892982 | TC | 0.426 | 0.901 | 5.1E-07 | rs12436216           | 34879165 | 0.867          | AG                   | 0.429 | 0.902 | 8.1E-07 | GA               | 0.946 | 0.595 | 0.417 | Y     | N    | N   | 1.057 |
| rs1869901                                  | 15  | 38382919 | AG | 0.608 | 0.898 | 3.5E-07 |                      |          |                |                      |       |       |         | TC               | 0.872 | 0.626 | 0.050 | N     | Y    | Y   | 0.872 |
| rs4775413                                  | 15  | 59627395 | TC | 0.540 | 1.101 | 4.0E-06 | rs2414718            | 59650425 | 0.691          | AG                   | 0.585 | 1.099 | 7.1E-06 | GA               | 0.937 | 0.387 | 0.346 | Y     | N    | Y   | 1.067 |
| rs1078163                                  | 15  | 86269935 | TC | 0.850 | 0.879 | 5.1E-06 |                      |          |                |                      |       |       |         | GA               | 0.869 | 0.178 | 0.112 | N     | N    | N   | 1.151 |
| rs16957445                                 | 18  | 49657366 | TC | 0.301 | 0.903 | 8.2E-06 | rs1364467            | 49494095 | 0.347          | TG                   | 0.813 | 1.114 | 5.9E-05 | CA               | 1.224 | 0.177 | 0.019 | N     | N    | N   | 1.224 |
| rs12966547                                 | 18  | 50903015 | AG | 0.417 | 0.902 | 1.0E-06 | rs4309482            | 50901467 | 1.000          | AG                   | 0.583 | 1.108 | 1.1E-06 | GA               | 0.985 | 0.397 | 0.827 | Y     | N    | Y   | 0.985 |
| rs17512836                                 | 18  | 51345959 | TC | 0.975 | 0.711 | 2.4E-08 | rs17594721           | 51216890 | 0.768          | AG                   | 0.972 | 0.753 | 1.1E-06 | GA               | 1.022 | 0.032 | 0.895 | Y     | N    | Y   | 0.978 |
| rs7248806                                  | 19  | 946943   | TG | 0.659 | 1.142 | 3.0E-05 | rs2240152            | 943903   | 0.580          | TC                   | 0.533 | 1.082 | 1.7E-03 | TC               | 1.098 | 0.522 | 0.175 | Y     | Y    | Y   | 1.098 |
| rs8112050                                  | 19  | 37323114 | TC | 0.704 | 0.906 | 1.8E-05 |                      |          |                |                      |       |       |         | TC               | 0.970 | 0.693 | 0.678 | Y     | Y    | Y   | 0.970 |
| rs16997475                                 | 21  | 26430592 | AG | 0.063 | 1.209 | 9.6E-06 | rs7283136            | 26365981 | 0.869          | TC                   | 0.933 | 0.841 | 1.6E-05 | TC               | 0.909 | 0.926 | 0.448 | Y     | Y    | Y   | 1.100 |
| rs2833899                                  | 21  | 32855134 | TC | 0.821 | 1.134 | 4.1E-06 | rs11702343           | 32859759 | 1.000          | AC                   | 0.179 | 0.883 | 4.9E-06 | CA               | 0.954 | 0.849 | 0.620 | Y     | N    | N   | 0.954 |
| rs7289747                                  | 22  | 18290716 | AC | 0.937 | 0.835 | 9.7E-06 |                      |          |                |                      |       |       |         | CA               | 1.025 | 0.063 | 0.843 | Y     | N    | Y   | 0.976 |

For the PGC phase 1 GWAS of 17 schizophrenia datasets comprising 9,394 cases and 12,462 controls of European ancestry (3), data are shown for the 58 SNPs with the top p-values, selecting the best SNP in any region while excluding additional SNPs with pairwise LD > 0.2 (and selecting only the SNP with the best p-value in the Major Histocompatibility Complex region on chromosome 6). Shown for these 58 SNPs are:

The SNP ID, chromosome (CHR), base pair (BP) position (HG18 locations), the two SNP alleles (A), frequency of Allele 1 (FrA1), odds ratio (OR) and P-value (P) in the PGC GWAS, which was a combined analysis of genotyped and imputed data, correcting for ancestry and study.

For SNPs not genotyped in the family sample, the closest proxy (nearby SNP with  $r^2 > 0.3$ ) genotyped in that sample was selected, and the data shown include the SNP ID, base pair position, and  $r^2$  value between the PGC best SNP and the proxy, and then the PGC data for that SNP.

The family study data (for the PGC SNP or proxy) are then shown, followed by columns showing whether the PGC and family study analysis were for the same strand (Yes or No) and the same test allele, and whether the direction of the effect was in the same direction (both odds ratios > 1 or both odds ratios < 1) after correcting for strand or test allele differences.

The “Corr OR” column is the odds ratio for the family study after correcting for strand and/or test allele.

PGC and family study odds ratios were in the same direction for 37 of 58 SNPs. A one-sided binomial test yielded  $p=0.024$  for the probability of observing 37 or more agreements. If we restricted the analysis to family study proxies with  $r^2 > 0.8$ , there were 29 agreements out of 45 SNPs ( $p=0.036$ ).

## Summary of pathway-based analyses (ALIGATOR)

The ALIGATOR software package (4) was used to evaluate whether more significant p-values were observed for SNPs in genes in genetic pathways as defined by the GO, KEGG, MGI, PANTHER, BioCarta and Reactome databases, plus two additional sets of interest; a locally-curated list of 58 genes whose products are known to interact with neurexins, because of the significant association of schizophrenia with chromosomal deletions of exons of NRXN1 (5, 6); and a set of 386 genes (based on the Aceview database) whose products have immunoglobulin structures, which may play a role in brain development (7). Briefly, we selected a set of SNPs based on a threshold of  $P < 0.00667$  (chosen because this selected 5% of genes as containing at least one such SNP). ALIGATOR then defined a list of “significant” genes as the set of genes which contain at least one such SNP, counting gene only once, regardless of how many “significant” SNPs it contains, since multiple significant SNPs may reflect linkage disequilibrium within the gene, rather than independent signals. Note that in this analysis we considered only SNPs that lay within the largest transcript of each gene, without allowing for any margin around genes. A large number of replicate gene lists of the same length as the list of significant genes from the actual data were then generated by selecting SNPs (not genes) at random. This allows for large genes containing several SNPs being more likely to contain a significant SNP by chance than small genes. The number of significant genes in a pathway in the actual data was compared to the number of genes from that pathway in the replicate gene lists, thereby giving a pathway-specific p-value for enrichment. These were corrected for multiple testing of non-independent pathways by a bootstrapping method (for more details, see (4)), which also gives a test of whether the number of pathways achieving a given level of significance is higher than expected. Importantly, genes from the same pathway lying less than 1Mb apart were counted as the same signal, to correct for the possibility that their associations were due to intergenic LD. A Simes-corrected p-value was then determined for each gene -- i.e., this p-value serves as a correction for the number of SNPs in a gene and thus gives information about the relative significance of genes, but does not correct for the number of genes tested.

Results are summarized in Tables S4 and S5 below. There were no significant results: there was no pathway with a significant p-value after permutation-based study-wide correction (i.e., across pathways), and no significant excess of the number of pathways exceeding any of three thresholds (Table S4a). However, results may be of interest for comparison with other findings

**Table S5a: ALIGATOR analysis of the total number of “significant” pathways**

| Families          | Best pathway corrected P | Uncorrected threshold for declaring a pathway to contain an excess of genes with $\geq 1$ SNP with $P < 0.00667$ (i.e., in top 5% of genes) |       |            |       |             |       |
|-------------------|--------------------------|---------------------------------------------------------------------------------------------------------------------------------------------|-------|------------|-------|-------------|-------|
|                   |                          | $P < 0.05$                                                                                                                                  |       | $P < 0.01$ |       | $P < 0.001$ |       |
|                   |                          | #pathways                                                                                                                                   | p     | #pathways  | p     | #pathways   | p     |
| European-ancestry | 0.796                    | 325                                                                                                                                         | 0.244 | 78         | 0.130 | 8           | 0.309 |
| All families      | 0.662                    | 405                                                                                                                                         | 0.064 | 93         | 0.058 | 9           | 0.266 |

In this analysis using the methods described above, 861 genes were declared “significant” because they contained at least one SNP with uncorrected  $P < 0.00667$  (a threshold which selected 5% of genes as “significant”, with 4,014 SNPs meeting this criterion).

Permutation-based procedures were used to determine which pathways had a significant (uncorrected) excess of genes containing at least one “significant” SNP based on three different thresholds for declaring the excess in each pathway to be significant (0.05, 0.01 and 0.001), and to determine whether the total number of such pathways exceeded chance expectation. The corrected significance (across all pathways) for each pathway was also determined and the best value is shown for each analysis (European-ancestry and all families) -- see further details below for the primary European-ancestry analysis (all-family results available on request).

No single pathway achieved corrected significance, and the number of pathways with an excess of “significant” genes was not significant at any of the three thresholds.

**Table S5b: Top pathway results  
(European-ancestry families, pathways containing  $\geq 10$  genes)**

| PATHWAY   | # GENES | # with $P < 0.05$ | EXPECTED # GENES | PATHWAY-SPECIFIC P | CORRECTED P | EXPECTED PATHWAYS PER STUDY | PATHWAY FUNCTION                       |
|-----------|---------|-------------------|------------------|--------------------|-------------|-----------------------------|----------------------------------------|
| GO: 6898  | 51      | 11                | 3.95             | 2E-04              | 0.796       | 2.36                        | receptor-mediated endocytosis          |
| GO: 1755  | 18      | 5                 | 0.79             | 4E-04              | 0.886       | 3.31                        | neural crest cell migration            |
| GO: 34707 | 51      | 11                | 4.37             | 6E-04              | 0.936       | 4.27                        | chloride channel complex               |
| GO: 48705 | 100     | 16                | 7.3              | 1E-03              | 0.979       | 6.19                        | skeletal system morphogenesis          |
| GO: 1667  | 29      | 6                 | 1.33             | 1E-03              | 0.979       | 6.19                        | ameboidal cell migration               |
| MGI: 1407 | 26      | 9                 | 4.16             | 1E-03              | 0.989       | 7.23                        | short stride length                    |
| GO: 48306 | 25      | 5                 | 0.95             | 1E-03              | 0.992       | 8.21                        | calcium-dependent protein binding      |
| MGI: 79   | 19      | 6                 | 1.72             | 2E-03              | 0.995       | 11.22                       | abnormal basioccipital bone morphology |
| GO: 34660 | 227     | 13                | 5.13             | 2E-03              | 0.998       | 13.29                       | ncRNA metabolic process                |
| GO: 6364  | 76      | 5                 | 1.03             | 2E-03              | 0.998       | 13.29                       | rRNA processing                        |
| GO: 16072 | 79      | 5                 | 1.06             | 2E-03              | 0.998       | 13.29                       | rRNA metabolic process                 |
| GO: 5689  | 18      | 3                 | 0.3              | 2E-03              | 0.998       | 13.29                       | U12-type spliceosomal complex          |
| GO: 5246  | 10      | 4                 | 1.14             | 3E-03              | 0.999       | 15.41                       | calcium channel regulator activity     |

For the analysis described in the Table S4a legend, Table S4b shows results for the top pathways, excluding those containing  $< 10$  genes. See Table S5 for information on individual genes. Note that some genes were considered part of more than one of the pathways shown here (see Table S5), although this overlap is accounted for by the permutation-based procedure to determine P-values.

**Table S6: Genes with SIMES-corrected P<0.05 in the 13 pathways listed in Table S5b**

| GENE                                             | CHR | START (BP) | END (BP)  | N(SNPS) | MOST SIG P | SIMES-CORR P | MOST SIG SNP | DESCRIPTION                                     |
|--------------------------------------------------|-----|------------|-----------|---------|------------|--------------|--------------|-------------------------------------------------|
| <b>GO: 6898 (receptor-mediated endocytosis)</b>  |     |            |           |         |            |              |              |                                                 |
| CAV1                                             | 7   | 115952075  | 115988466 | 13      | 4.9E-04    | 4.9E-03      | rs3807986    | caveolin 1                                      |
| IGF2R                                            | 6   | 160310121  | 160447573 | 39      | 4.0E-04    | 1.3E-02      | rs435612     | insulin-like growth factor 2 receptor precursor |
| HTR2B                                            | 2   | 231681199  | 231698068 | 3       | 4.5E-03    | 1.4E-02      | rs17586405   | 5-hydroxytryptamine (serotonin) receptor 2B     |
| ARHGAP27                                         | 17  | 40827058   | 40858780  | 5       | 3.2E-03    | 1.6E-02      | rs1059504    | Rho GTPase activating protein 27                |
| HIP1R                                            | 12  | 121885992  | 121913460 | 5       | 3.4E-03    | 1.7E-02      | rs2271051    | huntingtin interacting protein-1-related        |
| CETP                                             | 16  | 55553263   | 55575257  | 14      | 1.4E-03    | 2.0E-02      | rs5882       | cholesteryl ester transfer protein, plasma      |
| MSR1                                             | 8   | 16009758   | 16094671  | 17      | 1.4E-03    | 2.4E-02      | rs17484273   | macrophage scavenger receptor 1 isoform type 1  |
| PPT1                                             | 1   | 40310969   | 40335555  | 12      | 2.3E-03    | 2.7E-02      | rs7543269    | palmitoyl-protein thioesterase 1                |
| DNM1                                             | 9   | 130005484  | 130057348 | 13      | 2.9E-03    | 3.8E-02      | rs3003569    | dynamamin 1 isoform 1                           |
| <b>GO: 1755 (neural crest cell migration)</b>    |     |            |           |         |            |              |              |                                                 |
| HTR2B                                            | 2   | 231681199  | 231698068 | 3       | 4.5E-03    | 1.4E-02      | rs17586405   | 5-hydroxytryptamine (serotonin) receptor 2B     |
| KITLG                                            | 12  | 87410697   | 87498369  | 18      | 1.4E-03    | 2.5E-02      | rs10777131   | KIT ligand isoform a precursor                  |
| ACVR1                                            | 2   | 158301207  | 158403036 | 13      | 3.2E-03    | 4.2E-02      | rs10497192   | activin A type I receptor precursor             |
| <b>GO: 34707 (chloride channel complex)</b>      |     |            |           |         |            |              |              |                                                 |
| GABRG1                                           | 4   | 45732543   | 45820839  | 14      | 1.4E-05    | 2.0E-04      | rs12511372   | gamma-aminobutyric acid A receptor, gamma 1     |
| GABRA2                                           | 4   | 45946463   | 46086702  | 10      | 4.3E-05    | 3.5E-04      | rs534459     | gamma-aminobutyric acid A receptor, alpha 2     |
| ANO5                                             | 11  | 22171298   | 22257975  | 9       | 4.0E-03    | 1.6E-02      | rs7951981    | anoctamin 5                                     |
| GABRB1                                           | 4   | 46728336   | 47123202  | 71      | 2.6E-04    | 1.8E-02      | rs4396968    | gamma-aminobutyric acid (GABA) A receptor, beta |
| GABRE                                            | 23  | 150872252  | 150893807 | 10      | 2.6E-03    | 2.6E-02      | rs2266856    | gamma-aminobutyric acid (GABA) A receptor       |
| GABRG2                                           | 5   | 161427295  | 161515106 | 19      | 1.5E-03    | 2.9E-02      | rs211029     | gamma-aminobutyric acid A receptor, gamma 2     |
| ANO10                                            | 3   | 43382822   | 43638564  | 16      | 3.0E-03    | 4.9E-02      | rs17075727   | anoctamin 10                                    |
| <b>GO: 48705 (skeletal system morphogenesis)</b> |     |            |           |         |            |              |              |                                                 |
| THRA                                             | 17  | 35472589   | 35503646  | 3       | 3.5E-04    | 1.0E-03      | rs3744805    | thyroid hormone receptor, alpha isoform 1       |
| RARG                                             | 12  | 51890620   | 51912303  | 5       | 2.7E-03    | 8.1E-03      | rs1465057    | retinoic acid receptor, gamma isoform 1         |
| COL9A1                                           | 6   | 70982529   | 71069494  | 41      | 2.8E-04    | 8.1E-03      | rs544179     | alpha 1 type IX collagen isoform 1 precursor    |
| MDFI                                             | 6   | 41714231   | 41729959  | 5       | 2.3E-03    | 1.1E-02      | rs4714501    | MyoD family inhibitor                           |
| DSCAML1                                          | 11  | 116803699  | 117173186 | 150     | 1.8E-04    | 1.7E-02      | rs558582     | Down syndrome cell adhesion molecule like 1     |
| BMP7                                             | 20  | 55178962   | 55274708  | 29      | 8.6E-04    | 2.5E-02      | rs6025446    | bone morphogenetic protein 7 precursor          |
| HOXD3                                            | 2   | 176737051  | 176746072 | 1       | 2.5E-02    | 2.5E-02      | rs2301301    | homeobox D3                                     |
| SIX4                                             | 14  | 60246009   | 60260545  | 1       | 2.8E-02    | 2.8E-02      | rs17834412   | sine oculis homeobox homolog 4                  |
| PEX7                                             | 6   | 137185416  | 137276752 | 9       | 3.4E-03    | 3.0E-02      | rs3799479    | peroxisomal biogenesis factor 7                 |
| BMP6                                             | 6   | 7672010    | 7826960   | 48      | 1.9E-03    | 3.3E-02      | rs270392     | bone morphogenetic protein 6 preproprotein      |
| PRRX2                                            | 9   | 131467741  | 131524774 | 10      | 3.9E-03    | 3.9E-02      | rs7858199    | paired related homeobox 2                       |
| WNT9B                                            | 17  | 42283967   | 42309436  | 5       | 1.0E-02    | 4.1E-02      | rs2165846    | wingless-type MMTV integration site family      |
| <b>GO: 1667 (ameboidal cell migration)</b>       |     |            |           |         |            |              |              |                                                 |
| HTR2B                                            | 2   | 231681199  | 231698068 | 3       | 4.5E-03    | 1.4E-02      | rs17586405   | 5-hydroxytryptamine (serotonin) receptor 2B     |
| KITLG                                            | 12  | 87410697   | 87498369  | 18      | 1.4E-03    | 2.5E-02      | rs10777131   | KIT ligand isoform a precursor                  |

|                                                         |    |           |           |     |         |         |            |                                                     |
|---------------------------------------------------------|----|-----------|-----------|-----|---------|---------|------------|-----------------------------------------------------|
| <i>ACVR1</i>                                            | 2  | 158301207 | 158403036 | 13  | 3.2E-03 | 4.2E-02 | rs10497192 | activin A type I receptor precursor                 |
| <b>MGI: 1407 (short stride length)</b>                  |    |           |           |     |         |         |            |                                                     |
| <i>CAV1</i>                                             | 7  | 115952075 | 115988466 | 13  | 4.9E-04 | 4.9E-03 | rs3807986  | caveolin 1                                          |
| <i>HMBS</i>                                             | 11 | 118460797 | 118469469 | 1   | 1.9E-02 | 1.9E-02 | rs1784304  | hydroxymethylbilane synthase isoform 1              |
| <i>NPAS3</i>                                            | 14 | 32478200  | 33340702  | 367 | 1.1E-04 | 4.1E-02 | rs12147692 | neuronal PAS domain protein 3 isoform 1             |
| <b>GO: 48306 (calcium-dependent protein binding)</b>    |    |           |           |     |         |         |            |                                                     |
| <i>DMBT1</i>                                            | 10 | 124310171 | 124393242 | 4   | 5.6E-04 | 2.3E-03 | rs8441     | deleted in malignant brain tumors 1 isoform a       |
| <i>ANXA11</i>                                           | 10 | 81904860  | 81955308  | 12  | 2.9E-04 | 3.4E-03 | rs6585424  | annexin A11                                         |
| <i>STX2</i>                                             | 12 | 129840098 | 129889764 | 8   | 4.9E-03 | 2.5E-02 | rs1554807  | syntaxin 2 isoform 1                                |
| <i>TNNT3</i>                                            | 11 | 1897445   | 1916514   | 3   | 1.1E-02 | 3.2E-02 | rs909116   | troponin T3, skeletal, fast isoform 1               |
| <i>MASP1</i>                                            | 3  | 188418632 | 188492446 | 35  | 1.1E-03 | 3.8E-02 | rs12489890 | mannan-binding lectin serine protease 1 isoform     |
| <b>MGI: 79 (abnormal basioccipital bone morphology)</b> |    |           |           |     |         |         |            |                                                     |
| <i>RARG</i>                                             | 12 | 51890620  | 51912303  | 5   | 2.7E-03 | 8.1E-03 | rs1465057  | retinoic acid receptor, gamma isoform 1             |
| <i>BMP7</i>                                             | 20 | 55178962  | 55274708  | 29  | 8.6E-04 | 2.5E-02 | rs6025446  | bone morphogenetic protein 7 precursor              |
| <b>GO: 34660 (ncRNA metabolic process)</b>              |    |           |           |     |         |         |            |                                                     |
| <i>AARS</i>                                             | 16 | 68843798  | 68880913  | 2   | 3.1E-04 | 6.3E-04 | rs2070203  | alanyl-tRNA synthetase                              |
| <i>BOP1</i>                                             | 8  | 145456864 | 145485928 | 4   | 5.8E-04 | 2.3E-03 | rs11781564 | block of proliferation 1, block of proliferation 1, |
| <i>RARS2</i>                                            | 6  | 88280820  | 88356440  | 6   | 5.0E-04 | 3.0E-03 | rs7757636  | arginyl-tRNA synthetase-like                        |
| <i>DIMT1L</i>                                           | 5  | 61720108  | 61735485  | 2   | 1.7E-03 | 3.4E-03 | rs35015    | dimethyladenosine transferase                       |
| <i>SNRPF</i>                                            | 12 | 94776840  | 94784369  | 2   | 2.2E-03 | 4.4E-03 | rs3751264  | small nuclear ribonucleoprotein polypeptide F       |
| <i>PES1</i>                                             | 22 | 29302612  | 29317894  | 3   | 2.0E-03 | 6.1E-03 | rs4820018  | pescadillo homolog 1, containing BRCT domain        |
| <i>CDK5RAP1</i>                                         | 20 | 31410306  | 31452998  | 5   | 1.5E-03 | 7.6E-03 | rs291671   | CDK5 regulatory subunit associated protein 1        |
| <i>TPR</i>                                              | 1  | 184547407 | 184611080 | 8   | 3.7E-03 | 1.2E-02 | rs3820182  | nuclear pore complex-associated protein TPR         |
| <i>ADAT3</i>                                            | 19 | 1856417   | 1864446   | 1   | 1.5E-02 | 1.5E-02 | rs7260336  | hypothetical protein LOC113179                      |
| <i>C4orf23</i>                                          | 4  | 8507043   | 8529181   | 3   | 5.8E-03 | 1.7E-02 | rs16842315 | hypothetical protein LOC152992 isoform 2            |
| <i>SIP1</i>                                             | 14 | 38653239  | 38675928  | 2   | 1.9E-02 | 3.8E-02 | rs9322993  | SMN-interacting protein 1 isoform alpha             |
| <i>ERI1</i>                                             | 8  | 8897860   | 8925899   | 6   | 6.5E-03 | 3.9E-02 | rs2953807  | exoribonuclease 1                                   |
| <i>UTP11L</i>                                           | 1  | 38250971  | 38263084  | 1   | 4.2E-02 | 4.2E-02 | rs11211383 | UTP11-like, U3 small nucleolar                      |
| <i>NSA2</i>                                             | 5  | 74098859  | 74108490  | 1   | 4.3E-02 | 4.3E-02 | rs1164694  | NSA2 ribosome biogenesis homolog (S. cerevisiae)    |
| <i>SNRPG</i>                                            | 2  | 70362009  | 70374373  | 1   | 4.5E-02 | 4.5E-02 | rs6708754  | small nuclear ribonucleoprotein polypeptide G       |
| <b>GO: 6364 (rRNA processing)</b>                       |    |           |           |     |         |         |            |                                                     |
| <i>BOP1</i>                                             | 8  | 145456864 | 145485928 | 4   | 5.8E-04 | 2.3E-03 | rs11781564 | block of proliferation 1                            |
| <i>DIMT1L</i>                                           | 5  | 61720108  | 61735485  | 2   | 1.7E-03 | 3.4E-03 | rs35015    | dimethyladenosine transferase                       |
| <i>PES1</i>                                             | 22 | 29302612  | 29317894  | 3   | 2.0E-03 | 6.1E-03 | rs4820018  | pescadillo homolog 1, containing BRCT domain        |
| <i>ERI1</i>                                             | 8  | 8897860   | 8925899   | 6   | 6.5E-03 | 3.9E-02 | rs2953807  | exoribonuclease 1                                   |
| <i>UTP11L</i>                                           | 1  | 38250971  | 38263084  | 1   | 4.2E-02 | 4.2E-02 | rs11211383 | UTP11-like, U3 small nucleolar                      |
| <i>NSA2</i>                                             | 5  | 74098859  | 74108490  | 1   | 4.3E-02 | 4.3E-02 | rs1164694  | NSA2 ribosome biogenesis homolog (S. cerevisiae)    |

Shown are data for each gene with a Simes-corrected gene-wise p-value < 0.05 in the 13 pathways listed in Table S4b. There are 58 unique genes, of which 6 (shown in italics) are listed in more than one pathway.

**Table S7: Functional annotation of genes with  $\geq 1$  SNP with  $P < 0.0001$  (European-ancestry families)**

| Gene                  | Description                                           | Comment (function)                                                                                     |
|-----------------------|-------------------------------------------------------|--------------------------------------------------------------------------------------------------------|
| EXOC2                 | Sec5 protein                                          | vesicle transport                                                                                      |
| PPFIA2                | PTPRF interacting protein alpha 2                     | axon guidance                                                                                          |
| CNTNAP5               | contactin associated protein-like 5 isoform 1         | neurexin family, cell adhesion, signaling                                                              |
| TMTC1                 | ARG99 protein                                         |                                                                                                        |
| GABRG1                | gamma-aminobutyric acid A receptor, gamma 1           |                                                                                                        |
| GABRA2                | gamma-aminobutyric acid A receptor, alpha 2           |                                                                                                        |
| BSN                   | bassoon protein                                       | neuronal glutamate release                                                                             |
| APEH                  | N-acylaminoacyl-peptide hydrolase                     | cancer; destroy oxidation-damaged proteins                                                             |
| MST1                  | macrophage stimulating 1 (hepatocyte growth           | ciliary motility lung                                                                                  |
| RNF123                | ring finger protein 123                               | ubiquitin function                                                                                     |
| AMIGO3                | amphoterin-induced gene and ORF 3                     | cell adhesion (neuronal)                                                                               |
| GMPPB                 | GDP-mannose pyrophosphorylase B isoform 1             | oligosaccharide formation                                                                              |
| IHPK1                 | inositol hexaphosphate kinase 1 isoform 1             |                                                                                                        |
| PTPRN2                | protein tyrosine phosphatase, receptor type, N        | cellular growth, differentiation, autoantigen (DM)                                                     |
| ABCB5                 | ATP-binding cassette, sub-family B, member 5          | diverse; pigmented cells                                                                               |
| RYR2                  | cardiac muscle ryanodine receptor                     | cardiac contraction ; also expressed in brain                                                          |
| HAT1                  | histone acetyltransferase 1 isoform a                 | ?role in telomeric silencing                                                                           |
| MAP1D                 | methionine aminopeptidase 1D                          |                                                                                                        |
| CADM2                 | immunoglobulin superfamily, member 4D                 | cell adhesion molecule                                                                                 |
| ADCY7                 | adenylate cyclase 7                                   |                                                                                                        |
| BRD7                  | bromodomain containing 7                              | chromatin remodeling; p53 tumor suppression                                                            |
| DKFZp547H025          | hypothetical protein LOC56918                         | folate-transporter-like protein                                                                        |
| SLC19A3               | solute carrier family 19, member 3                    | biotin-responsive basal ganglia disease; Wernicke's-like encephalopathy                                |
| UBR4                  | retinoblastoma-associated factor 600                  | clathrin-related scaffolding; integrin-mediated signaling                                              |
| KIAA0090              | hypothetical protein LOC23065                         |                                                                                                        |
| MRTO4                 | ribosomal protein P0-like protein                     | ? role in ribosome assembly                                                                            |
| AFAR3                 | aflatoxin B1 aldehyde reductase 3                     |                                                                                                        |
| ERBB4                 | v-erb-a erythroblastic leukemia viral oncogene        | neuregulin receptor; neuronal differentiation                                                          |
| CLEC4D/E              | C-type lectin domain family 4, member D / member E    | cell adhesion; antigen uptake                                                                          |
| POP4                  | POP4 (processing of precursor, <i>S. cerevisiae</i> ) |                                                                                                        |
| PLEKHF1               | apoptosis-inducing protein D                          | induce apoptosis; weakly expressed in brain                                                            |
| FAM50B                | family with sequence similarity 50, member B          | fetal brain                                                                                            |
| VPS8                  | vacuolar protein sorting 8 homolog isoform b          |                                                                                                        |
| NAV3                  | neuron navigator 3                                    | ?neuronal regeneration; fetal brain                                                                    |
| CCDC38                | coiled-coil domain containing 38                      |                                                                                                        |
| AMDHD1                | amidohydrolase domain containing 1                    |                                                                                                        |
| HAL                   | histidine ammonia-lyase                               |                                                                                                        |
| LTA4H                 | leukotriene A4 hydrolase                              |                                                                                                        |
| SNRPN                 | small nuclear ribonucleoprotein polypeptide N         | pre-mRNA processing; SLE autoantigen                                                                   |
| AGBL1                 | ATP/GTP binding protein-like 1                        | tubulin processing                                                                                     |
| GABRR2                | gamma-aminobutyric acid (GABA) receptor, rho 2        | brain and esp retina                                                                                   |
| UBE2J1                | ubiquitin-conjugating enzyme E2, J1                   | attach of ubiq to proteins -- ER                                                                       |
| RRAGD                 | Ras-related GTP binding D                             | G protein                                                                                              |
| WWP2                  | WW domain containing E3 ubiquitin protein ligase      | NEDD4-like fam; ubiq prot ligase; inhib Tcell activ-induced cell death; atrophin-1-interacting protein |
| LOC348174/<br>CLEC18A | secretory protein LOC348174                           |                                                                                                        |



|          |                                                  |                                                     |
|----------|--------------------------------------------------|-----------------------------------------------------|
| ERG      | v-ets erythroblastosis virus E26 oncogene like   | transcr regulator; chromatin modification           |
| FAM19A5  | family with sequence similarity 19               | brain-spec chemokine/neurokine                      |
| OSBPL3   | oxysterol-binding protein-like protein 3 isoform | lipid receptor                                      |
| NANS     | N-acetylneuraminic acid phosphate synthase       | Produces N-acetylneuraminic acid (Neu5Ac)           |
| TRIM14   | tripartite motif protein TRIM14 isoform alpha    | inhibits SP1 (TF)                                   |
| CORO2A   | coronin, actin binding protein, 2A               | tf in diff and activation of macrophages or B-cells |
| KIAA1383 |                                                  |                                                     |
| INTS4    | integrator complex subunit 4                     | RNA splicing                                        |
| KCTD14   | potassium channel tetramerisation domain         |                                                     |

## Supplementary Methods for Candidate CNV Analyses

Case-control analyses of rare CNVs (frequency < 1% in controls) were carried out to identify new candidate CNVs. These analyses produced no statistically significant results given the number of tests that were performed (as expected given the small sample size), and thus are presented as supplementary material for the consideration of investigators in the field.

**Subjects.** The initial analysis considered one proband from each European-ancestry family (N=585, including 581 probands from families who were eligible for SNP association analyses plus 4 married-in cases who were not part of informative sibships) vs. 2,682 unrelated European-ancestry controls recruited (with informed consent) from general pediatric practices affiliated with Children's Hospital of Philadelphia (CHOP), with no congenital anomaly or neurological diagnoses in blinded electronic medical research records. CNVs observed in 1-2 probands and 0 controls, or 3 probands and 0-1 controls, were further examined for familial segregation: for all families with at least one carrier of the CNV (for all ancestries, whether or not the proband was the carrier), the number of carriers vs. non-carriers among siblings with a Narrow diagnosis (schizophrenia or schizoaffective disorder), with a "Broad" diagnoses in the three datasets for which these diagnoses were available (other non-affective psychoses or schizotypal or paranoid personality disorders; this information was available only for the Australia/US, Paris and VCU/Ireland datasets), and with no known schizophrenia spectrum disorder. We also examined the frequency of selected CNVs in data from the Molecular Genetics of Schizophrenia (6) study (3,945 schizophrenia or schizoaffective cases, 3,611 controls) and from the International Schizophrenia Consortium (8) (3,391 schizophrenia cases, 3,181 controls) (<http://pngu.mgh.harvard.edu/isc/isc-r1.cnv.bed>). Results of these analyses are shown in Table S8, with deletions and duplications each grouped according to the degree of familial segregation (>75% or <75% of narrow-diagnosis siblings carrying the CNV).

**Methods.** QC filtering was carried out for families and CHOP controls. Subjects were excluded if they had  $\geq 50$  CNV calls or if the standard deviation of the  $\log(R)$  ratio was  $> 0.4$

(increased signal variability across all probes). Based on call concordance between 27 pairs of duplicate assays, we retained CNVs spanning  $\geq 5$  probes for homozygous deletions (88% concordance); or  $\geq 9$  for heterozygous deletions (91%) or for any duplication (81%). Higher thresholds did not improve concordance. Adjacent deletions (copy numbers [CN] 0 and 1) and duplications (3 and 4) were merged. Neighboring deletions or duplications were merged if an intervening segment with copy number=2 contained  $< 30\%$  of probes within the merged CNV. CNVs were excluded for 50% overlap with telomeric or centromeric regions or any overlap with immunoglobulin or olfactory receptor gene clusters. We excluded CNVs detected in  $> 50\%$  of family or control subjects; and CNVs in regions with patterns of multiple CNVs in multiple individuals (mostly known segmental duplication regions) or in regions with common CNVs ( $> 1\%$  in either group) with a ten-fold or greater difference between family vs. control subjects suggesting technical artifact given that such high odds ratios are extremely unlikely for common variants. Also, we sought to minimize the possible effect of cell line artifacts. For the family sample, the source of extracted DNA (lymphoblastic cell line vs. fresh blood) was definitively known for approximately two-thirds of the specimens, of which 59% were extracted from blood and 41% from cell lines. There was no overall difference in CNV count between these two groups, but we excluded CNVs that were greater than 4 Mb long (which are usually cell line artifacts (6)), and CNVs in regions with: significantly different prevalence in specimens known to be of cell line vs. blood origin. All excluded regions are listed in **Table S10**, below.

Post-QC, family members had more total CNVs than controls ( $7.28 \pm 3.22$  vs.  $5.98 \pm 2.50$ ,  $p < 10^{-15}$ ), primarily deletions  $< 100,000$  bp ( $p < 10^{-15}$ ; duplications,  $p = 0.0028$ ). However, this is consistent with the larger SD(log(R) ratio) in family members ( $0.156 \pm 0.034$  vs.  $0.138 \pm 0.029$ ,  $p < 10^{-15}$ ), suggesting a technical difference between family and control samples which were genotyped separately. Thus this is not an appropriate dataset for testing the hypothesis of a genome-wide excess of rare CNVs in schizophrenia (6, 8, 9), including familial schizophrenia (10).

Rare CNVs selected as possible candidates (see below) were visualized in all family members by plotting log(R) ratio, B-allele frequency (BAF) and point-by-point CN estimates using a second algorithm (11). Regions were discarded if the PennCNV calls were not confirmed and/or if the data for family members without CNV calls was ambiguous, suggesting technical artifacts in the region. Because this was an exploratory analysis and no statistically significant results were observed, independent biological validation was not carried out.

**Analysis of association.** We identified rare (present in <1% of controls) candidate deletions and of duplications that disrupted exons of RefSeq genes (HG18). Separately for deletions and duplications, PLINK (12) counted exonic CNVs for each gene for 585 European-ancestry unrelated cases vs. 2,682 CHOP controls, and computed empirical pointwise and genome-wide P-values by permuting case-control status. Genes with exonic CNVs in less than 1% of controls were considered further. Exploratory analyses added the remaining 578 narrow-diagnosis relatives and then 152 broad cases; analyses were repeated for all ancestries (adding 47 probands, 89 other narrow cases, and 10 broad cases). For genes with pointwise  $p < 0.05$  (EUR) or control counts of 0-1 and a clear excess in ALL narrow+broad cases: all CNVs in family members were plotted (visualization of log(R) ratio and B allele frequency, and analysis of point-by-point copy number estimate by a second method ; regions with multiple ambiguous calls excluded; familial segregation examined; and MGS and ISC case-control counts inspected.

**Table S8: Candidate CNVs**

| GENE(S)                                                                                       | LOCATION (HG18)    | Size(s)         | Fams | European-ancestry case-control analysis |             |            |             | All Siblings with/without CNV |       |   |       |   | ISC study |    | MGS Study |    |    |
|-----------------------------------------------------------------------------------------------|--------------------|-----------------|------|-----------------------------------------|-------------|------------|-------------|-------------------------------|-------|---|-------|---|-----------|----|-----------|----|----|
|                                                                                               |                    |                 |      | N with CNV                              |             | Point-Wise | Genome-Wide | Narrow                        | Broad |   | Unaff |   | Ca        | Co | Ca        | Co |    |
|                                                                                               |                    |                 |      | Case N=585                              | Cont N=2682 |            |             |                               | +     | - | +     | - |           |    |           |    | +  |
| <b>DELETIONS observed in at least 75% of narrow-diagnosis siblings in carrier families</b>    |                    |                 |      |                                         |             |            |             |                               |       |   |       |   |           |    |           |    |    |
| TXNIP... POLR3C†                                                                              | chr1:144.11-144.48 | 121K, 330K,376K | 2    | 2                                       | 0           | 0.031      | 0.974       | 2                             | 1     |   |       | 0 | 1         | 1  | 1         | 2  | 0  |
| LY75                                                                                          | chr2:160.42-160.46 | 45K             | 1    | 0                                       | 0           | 1.000      | 1.000       | 4                             | 0     |   |       |   |           |    |           | 3  | 1  |
| SGCD                                                                                          | chr5:155.46-155.69 | 232K            | 1    | 1                                       | 0           | 0.177      | 1.000       | 3                             | 0     |   |       |   |           | 0  | 0         | 0  | 0  |
| LOC729920,SOSTDC1‡                                                                            | chr7:16.39-16.51   | 115K            | 1    | 0                                       | 0           | 1.000      | 1.000       | 4                             | 0     |   |       |   |           | 0  | 0         | 4  | 2  |
| PSD3                                                                                          | chr8:18.61-18.72   | 62K,110K        | 3    | 2                                       | 0           | 0.034      | 0.974       | 4                             | 0     | 1 | 0     |   |           | 0  | 0         | 0  | 0  |
| GOLSYN,KCNV1                                                                                  | chr8:110.74-112.81 | 2071K           | 1    | 1                                       | 0           | 0.185      | 1.000       | 2                             | 0     |   |       |   |           | 0  | 0         | 0  | 1  |
| NUDT7                                                                                         | chr16:76.06-76.36  | 299K            | 1    | 1                                       | 0           | 0.180      | 1.000       | 2                             | 0     |   |       |   |           | 0  | 1         | 0  | 0  |
| TCF4                                                                                          | chr18:50.98-51.04  | 61K             | 1    | 1                                       | 0           | 0.184      | 1.000       | 2                             | 0     |   |       |   |           |    |           | 0  | 0  |
| ZNF100,ZNF43                                                                                  | chr19:21.72-21.83  | 118K            | 1    | 1                                       | 0           | 0.178      | 1.000       | 2                             | 0     | 1 | 0     |   |           | 0  | 2         | 0  | 0  |
| ZNF600,ZNF28,ZNF468*                                                                          | chr19:57.96-58.05  | 27K-91K         | 5    | 2                                       | 0           | 0.035      | 0.974       | 6                             | 2     |   |       | 0 | 1         | 1  | 0         | 5  | 0  |
| APOL3                                                                                         | chr22:34.87-34.91  | 37K,43K         | 2    | 2                                       | 0           | 0.030      | 0.974       | 3                             | 0     |   |       |   |           |    |           | 0  | 0  |
| <b>DELETIONS observed in &lt; 75% of narrow-diagnosis siblings in carrier families</b>        |                    |                 |      |                                         |             |            |             |                               |       |   |       |   |           |    |           |    |    |
| PRSS35                                                                                        | chr6:84.21-84.29   | 75K             | 2    | 2                                       | 0           | 0.032      | 0.974       | 2                             | 2     | 0 | 2     |   |           |    |           | 0  | 0  |
| PACRG**                                                                                       | chr6:163-163.32    | 38K, 315K       | 2    | 1                                       | 0           | 0.182      | 1.000       | 2                             | 3     |   |       |   |           | 0  | 1         | 1  | 1  |
| C9orf11,MOBKL2B                                                                               | chr9:27.22-27.32   | 100K            | 1    | 1                                       | 0           | 0.178      | 1.000       | 1                             | 1     | 2 | 0     | 1 | 1         | 0  | 0         | 1  | 0  |
| <b>DUPLICATIONS observed in at least 75% of narrow-diagnosis siblings in carrier families</b> |                    |                 |      |                                         |             |            |             |                               |       |   |       |   |           |    |           |    |    |
| FBLN2                                                                                         | chr3:13.6-13.69    | 91K             | 1    | 0                                       | 0           | 1.000      | 1.000       | 3                             | 0     |   |       |   |           | 1  | 0         | 0  | 1  |
| LSM8,ANKRD7                                                                                   | chr7:117.17-118.95 | 177K            | 2    | 2                                       | 0           | 0.030      | 0.999       | 3                             | 0     | 0 | 1     |   |           | 0  | 2         | 0  | 0  |
| MSR1                                                                                          | chr8:15.73-16.39   | 650K-660K       | 2    | 1                                       | 0           | 0.180      | 1.000       | 3                             | 1     | 2 | 0     | 1 | 1         | 0  | 1         | 0  | 0  |
| WDR89,SGPP1                                                                                   | chr14:63.14-63.35  | 208K            | 1    | 1                                       | 0           | 0.185      | 1.000       | 3                             | 0     |   |       |   |           | 0  | 0         | 1  | 0  |
| ADAMTS17                                                                                      | chr15:98.17-98.4   | 229K            | 1    | 0                                       | 0           | 1.000      | 1.000       | 3                             | 0     |   |       |   |           | 2  | 1         | 9  | 4  |
| RICH2,ELAC2                                                                                   | chr17:12.73-12.9   | 148K,168K       | 2    | 2                                       | 0           | 0.032      | 0.999       | 3                             | 1     |   |       |   |           | 1  | 0         | 1  | 0  |
| MKKS,C20orf94                                                                                 | chr20:10.24-10.37  | 131K            | 1    | 1                                       | 0           | 0.184      | 1.000       | 3                             | 0     | 1 | 0     |   |           | 0  | 0         | 0  | 0  |
| CRYBB2                                                                                        | chr22:23.95-24.4   | 452K            | 1    | 1                                       | 0           | 0.180      | 1.000       | 2                             | 0     | 1 | 0     |   |           | 0  | 1         | 1  | 0  |
| <b>DUPLICATIONS observed in &lt; 75% of narrow-diagnosis siblings in carrier families</b>     |                    |                 |      |                                         |             |            |             |                               |       |   |       |   |           |    |           |    |    |
| MAST2,PIK3R3                                                                                  | chr1:46.17-46.35   | 58K, 175K       | 2    | 2                                       | 0           | 0.034      | 0.999       | 2                             | 3     |   |       |   |           | 1  | 2         | 8  | 1  |
| SRBD1,PRKCE                                                                                   | chr2:45.26-45.83   | 135K,527K,563K  | 4    | 3                                       | 0           | 0.006      | 0.358       | 7                             | 3     |   |       | 3 | 2         | 4  | 7         | 3  | 1  |
| COBL1                                                                                         | chr2:165.34-165.45 | 103K,110K       | 2    | 2                                       | 0           | 0.035      | 0.999       | 3                             | 2     |   |       | 4 | 2         | 0  | 0         | 0  | 1  |
| TRIM50,FKBP6                                                                                  | chr7:72.34-72.46   | 102K-142K       | 2    | 0                                       | 0           | 1.000      | 1.000       | 3                             | 2     |   |       |   |           | 1  | 0         | 6  | 2  |
| LILRB2***; LILRB3,<br>LILRB5, LILRA3 ,LILRA5###                                               | chr19:59.42-59.54  | 30K,110K,114K   | 7    | 3                                       | 1           | 0.019      | 0.999       | 6                             | 3     | 1 | 0     | 1 | 1         | 5  | 0         | 6  | 16 |

See legend on the next page.

**Table S9 legend.** The table provides information about the CNV regions that were selected as potential candidates for association with schizophrenia, based on uncorrected p-values < 0.05 in the EUR case-control analysis, or control counts of 0-1 and a clear excess in all narrow+broader cases. For these potential candidate CNVs, we examined within-family segregation and case-control counts in ISC and MGS datasets. Note that, in order to search as systematically as possible for new “candidate” CNVs, we carried out candidate CNV analyses was repeated using a “broader” diagnoses (other non-affective psychoses; schizotypal/paranoid personality disorders) that were available for the Australia/US, Paris and VCU/Ireland datasets.

“Gene(s)” lists the gene or genes in which exons are disrupted by the typical CNVs in the region (for those with variable length, there is some variability in which genes are disrupted).

“Size(s)” are the CNV length or lengths observed in carriers.

“Fams” is the number of families in which at least one individual carried the CNV.

For the European-ancestry case-control analysis, shown are the numbers of cases and of controls carrying the CNV, and the uncorrected (“point-wise”) and corrected (“genome-wide”) empirical P-values as determined by PLINK based on permutations of case-control status. Note that there are sometimes fewer CNV-carrying cases than families, because only one proband per family was included in the case-control analysis, and a different case in the family could have carried the CNV.

The next set of columns summarize within-family segregation with disease, for all ancestries. Shown are counts of siblings with and without the CNV, for those with Narrow diagnoses, Broad diagnoses (not including Narrow), and Unaffected siblings.

Case and control counts for these CNVs are shown for the ISC and MGS dataset, except that the publicly-available data for ISC includes only CNVs >100kb in length, so no ISC results are shown for shorter CNVs.

None of these CNVs produced genome-wide significant evidence for association in the family dataset. Larger datasets will be required to determine whether any are associated with schizophrenia.

† Genes include TXNIP, POLR3GL, ANKRD34A, LIX1L, RBM8A, PEX11B, ITGA10, ANKRD35, PIAS3, NUDT17, POLR3C; for ISC, counts exclude the 2 cases with long schizophrenia-associated 1q21 deletions extending to this more proximal region. ‡non-Eur.

\* MGS: 4 EA, 1 AA case; lower case-control ratios distally (6:4,18:11).

\*\* MGS: EA aff, AA unaff. #MGS 4:0 distally, 4EA, 4AA cases, 1 AA cont.

## ISC 9:0, MGS 4:5 more distally.

\*\*\* Counts shown are for LILRB2.

**Table S9: Functional annotation of genes in candidate CNVs**

| Gene     | Description                                                 | Chr | Strand | Gene_start | Gene_end  | Band     | UniProt_Function                                                                                                                                                                                                                   |
|----------|-------------------------------------------------------------|-----|--------|------------|-----------|----------|------------------------------------------------------------------------------------------------------------------------------------------------------------------------------------------------------------------------------------|
| TXNIP    | thioredoxin interacting protein                             | 1   | +      | 119402349  | 119406521 | 1q21.1   | May act as an oxidative stress mediator by inhibiting thioredoxin activity or by limiting its bioavailability. Required for the maturation of natural killer cells                                                                 |
| POLR3GL  | polymerase (RNA) III (DNA directed) polypeptide             | 1   | -      | 119420102  | 119434231 | 1q21.1   |                                                                                                                                                                                                                                    |
| ANKRD34A | ankyrin repeat domain 34                                    | 1   | +      | 119434352  | 119439409 | 1q21.1   |                                                                                                                                                                                                                                    |
| LIX1L    | Lix1 homolog (mouse) like                                   | 1   | +      | 119440847  | 119462785 | 1q21.1   |                                                                                                                                                                                                                                    |
| RBM8A    | RNA binding motif protein 8A                                | 1   | +      | 119471328  | 119475134 | 1q12     | Component of a splicing-dependent multiprotein exon junction complex (EJC) deposited at splice junction on mRNAs.                                                                                                                  |
| PEX11B   | peroxisomal biogenesis factor 11B                           | 1   | +      | 119479859  | 119487437 | 1q21.1   | Involved in peroxisomal proliferation. May regulate peroxisomes division by recruiting the dynamin-related GTPase DNM1L to the peroxisomal membrane                                                                                |
| ITGA10   | integrin, alpha 10 precursor                                | 1   | +      | 119488695  | 119507577 | 1q21     | Integrin alpha-10/beta-1 is a receptor for collagen                                                                                                                                                                                |
| ANKRD35  | ankyrin repeat domain 35                                    | 1   | +      | 119512931  | 119532243 | 1q21.1   |                                                                                                                                                                                                                                    |
| PIAS3    | protein inhibitor of activated STAT, 3                      | 1   | +      | 119539725  | 119550284 | 1q21     | Functions as an E3-type small ubiquitin-like modifier (SUMO) ligase. Plays a crucial role as a transcriptional coregulation in various cellular pathways, including the STAT pathway and the steroid hormone signaling pathway.    |
| NUDT17   | nudix (nucleoside diphosphate linked moiety                 | 1   | -      | 119550229  | 119553173 | 1q21.1   | Probably mediates the hydrolysis of some nucleoside diphosphate derivatives (By similarity)                                                                                                                                        |
| POLR3C   | polymerase (RNA) III (DNA directed) polypeptide             | 1   | -      | 119556179  | 119574446 | 1q21.1   | DNA-dependent RNA polymerase catalyzes the transcription of DNA into RNA. Plays a key role in sensing and limiting infection by intracellular bacteria and DNA viruses.                                                            |
| LY75     | lymphocyte antigen 75                                       | 2   | -      | 152542810  | 152644950 | 2q24     | Acts as an endocytic receptor to direct captured antigens from the extracellular space to a specialized antigen-processing compartment (By similarity). Causes reduced proliferation of B-lymphocytes.                             |
| SGCD     | delta-sarcoglycan                                           | 5   | +      | 150847340  | 151288441 | 5q33-q34 | Component of the sarcoglycan complex, a subcomplex of the dystrophin-glycoprotein complex which forms a link between the F-actin cytoskeleton and the extracellular matrix                                                         |
| ISPD     | Isoprenoid synthase domain-containing protein               | 7   | -      | 16012324   | 16460947  | 7p21.2   |                                                                                                                                                                                                                                    |
| SOSTDC1  | sclerostin domain containing 1 precursor                    | 7   | -      | 16387637   | 16392005  | 7p21.1   | May be involved in the onset of endometrial receptivity for implantation/sensitization for the decidual cell reaction. Enhances Wnt signaling and inhibits TGF-beta signaling (By similarity).                                     |
| PSD3     | ADP-ribosylation factor guanine nucleotide                  | 8   | -      | 16929317   | 17412683  | 8p21.3   | Guanine nucleotide exchange factor for ARF6 (By similarity)                                                                                                                                                                        |
| GOLSYN   | hypothetical protein FLJ20366                               | 8   | -      | 105908387  | 106025974 | 8q23.2   | Part of a kinesin motor-adaptor complex that is critical for the anterograde axonal transport of active zone components and contributes to activity-dependent presynaptic assembly during neuronal development (By similarity)     |
| KCNV1    | potassium channel, subfamily V, member 1                    | 8   | -      | 106301223  | 106308930 | 8q23.2   | Potassium channel subunit that does not form functional channels by itself. Modulates KCNB1 and KCNB2 channel activity by shifting the threshold for inactivation to more negative values and by slowing the rate of inactivation. |
| NUDT7    | nudix (nucleoside diphosphate linked moiety X)-type motif 7 | 16  | +      | 63512561   | 63532312  | 16q23.1  | Coenzyme A diphosphatase which mediates the cleavage of CoA, CoA esters and oxidized CoA with similar efficiencies.                                                                                                                |
| TCF4     | transcription factor 4                                      | 18  | -      | 49599225   | 49966085  | 18q21.1  | Transcription factor that binds to the immunoglobulin enhancer Mu-E5/KE5-motif.                                                                                                                                                    |

|          |                                                   |    |   |           |           |                        |                                                                                                                                                                                                                                                                                              |
|----------|---------------------------------------------------|----|---|-----------|-----------|------------------------|----------------------------------------------------------------------------------------------------------------------------------------------------------------------------------------------------------------------------------------------------------------------------------------------|
| ZNF100   | zinc finger protein 100                           | 19 | - | 21446567  | 21490144  | 19p12                  | May be involved in transcriptional regulation                                                                                                                                                                                                                                                |
| ZNF43    | zinc finger protein 43 (HTF6)                     | 19 | - | 21526978  | 21558296  | 19p13.1-p12            | May be involved in transcriptional regulation                                                                                                                                                                                                                                                |
| ZNF600   | zinc finger protein 600                           | 19 | - | 49596961  | 49618126  | 19q13.41               | May be involved in transcriptional regulation                                                                                                                                                                                                                                                |
| ZNF28    | zinc finger protein 28 (KOX 24)                   | 19 | - | 49628742  | 49652685  | 19q                    | May be involved in transcriptional regulation                                                                                                                                                                                                                                                |
| ZNF468   | zinc finger protein ZNF468                        | 19 | - | 49669384  | 49688491  | 19q13.41               | May be involved in transcriptional regulation                                                                                                                                                                                                                                                |
| APOL3    | apolipoprotein L3                                 | 22 | - | 19504519  | 19530392  | 22q13.1                | May affect the movement of lipids in the cytoplasm or allow the binding of lipids to organelles                                                                                                                                                                                              |
| PRSS35   | protease, serine, 35                              | 6  | + | 84222194  | 84235423  | 6q14.2                 |                                                                                                                                                                                                                                                                                              |
| PACRG    | parkin co-regulated gene protein                  | 6  | + | 160600313 | 161189795 | 6q26                   | Suppresses cell death induced by accumulation of unfolded Pael receptor (Pael-R, a substrate of Parkin). May play an important role in the formation of Lewy bodies and protection of dopaminergic neurons against Parkinson disease.                                                        |
| C9orf11  | Acr formation associated factor                   | 9  | - | 27237155  | 27249644  | 9p21                   | Involved in acrosome biogenesis (By similarity)                                                                                                                                                                                                                                              |
| MOBK2B   | MOB1, Mps One Binder kinase activator-like 2B     | 9  | - | 27277716  | 27529779  | 9p21.2                 | May regulate the activity of kinases (By similarity)                                                                                                                                                                                                                                         |
| FBLN2    | fibulin 2 precursor,                              | 3  | + | 13524043  | 13679922  | 3p25.1                 | Its binding to fibronectin and some other ligands is calcium dependent                                                                                                                                                                                                                       |
| LSM8     | U6 snRNA-associated Sm-like protein LSM8          | 7  | + | 112190045 | 112210037 | 7q31.1-q31.3           | Binds specifically to the 3'-terminal U-tract of U6 snRNA                                                                                                                                                                                                                                    |
| ANKRD7   | ankyrin repeat domain 7                           | 7  | + | 112230622 | 112248684 | 7q31                   |                                                                                                                                                                                                                                                                                              |
| MSR1     | macrophage scavenger receptor 1                   | 8  | - | 14509923  | 14594638  | 8p22                   | Membrane glycoproteins implicated in the pathologic deposition of cholesterol in arterial walls during atherogenesis. Two types of receptor subunits exist. These receptors mediate the endocytosis of a diverse group of macromolecules, including modified low density lipoproteins (LDL). |
| WDR89    | WD repeat domain 89                               | 14 | - | 44230434  | 44274925  | 14q23.2                |                                                                                                                                                                                                                                                                                              |
| SGPP1    | sphingosine-1-phosphatase                         | 14 | - | 44317325  | 44361142  | 14q23.2                | Has enzymatic activity against both sphingosine 1-phosphate (S1P) and dihydro-S1P. Regulates intracellular and extracellular S1P levels                                                                                                                                                      |
| ADAMTS17 | ADAM metalloproteinase with thrombospondin type 1 | 15 | - | 76635097  | 77005861  | 15q24                  |                                                                                                                                                                                                                                                                                              |
| RICH2    | hypothetical protein LOC9912                      | 17 | + | 12588245  | 12894960  | 17p12                  | GTPase activator for the Rho-type GTPases by converting them to an inactive GDP-bound state.                                                                                                                                                                                                 |
| ELAC2    | elaC homolog 2                                    | 17 | - | 12790637  | 12816700  | 17p11.2                | Zinc phosphodiesterase, which displays some tRNA 3'-processing endonuclease activity.                                                                                                                                                                                                        |
| MKKS     | McKusick-Kaufman syndrome protein                 | 20 | - | 10337605  | 10366635  | 20p12                  | Probable molecular chaperone. Assists the folding of proteins upon ATP hydrolysis.                                                                                                                                                                                                           |
| C20orf94 | hypothetical protein LOC128710                    | 20 | + | 10367720  | 10617477  | 20p12.2                |                                                                                                                                                                                                                                                                                              |
| CRYBB2   | crystallin, beta B2                               | 22 | + | 8563281   | 8575505   | 22q11.2-q12.1 22q11.23 | Crystallins are the dominant structural components of the vertebrate eye lens                                                                                                                                                                                                                |
| MAST2    | microtubule associated serine/threonine kinase    | 1  | + | 44384241  | 44616807  | 1p34.1                 | Appears to link the dystrophin/utrophin network with microtubule filaments via the syntrophins.                                                                                                                                                                                              |
| PIK3R3   | phosphoinositide-3-kinase, regulatory subunit 3   | 1  | - | 44620825  | 44713687  | 1p34.1                 | Binds to activated (phosphorylated) protein-tyrosine kinases through its SH2 domain and regulates their kinase activity. During insulin stimulation, it also binds to IRS-1                                                                                                                  |
| SRBD1    | S1 RNA binding domain 1                           | 2  | - | 45353674  | 45576490  | 2p21                   |                                                                                                                                                                                                                                                                                              |
| PRKCE    | protein kinase C, epsilon                         | 2  | + | 45617217  | 46415129  | 2p21                   | PKC is activated by diacylglycerol which in turn phosphorylates a range of cellular proteins. PKC also serves as the receptor for phorbol esters, a class of tumor promoters                                                                                                                 |



|        |                                                  |    |   |           |           |         |                                                                                                                             |
|--------|--------------------------------------------------|----|---|-----------|-----------|---------|-----------------------------------------------------------------------------------------------------------------------------|
| COBLL1 | COBL-like 1                                      | 2  | - | 157423744 | 157580438 | 2q24.3  |                                                                                                                             |
| TRIM50 | tripartite motif protein 50A                     | 7  | - | 68608277  | 68623822  | 7q11.23 | E3 ubiquitin-protein ligase                                                                                                 |
| FKBP6  | FK506-binding protein 6                          | 7  | + | 68623892  | 68654367  | 7q11.23 | PPIases accelerate the folding of proteins                                                                                  |
| LILRB2 | leukocyte immunoglobulin-like receptor,          | 19 | - | 51105316  | 51112671  | 19q13.4 | Receptor for class I MHC antigens. Involved in the down-regulation of the immune response and the development of tolerance. |
| LILRB3 | leukocyte immunoglobulin-like receptor           | 19 | - | 54720147  | 54746602  | 19q13.4 | May act as receptor for class I MHC antigens                                                                                |
| LILRB5 | leukocyte immunoglobulin-like receptor           | 19 | - | 51081906  | 51088803  | 19q13.4 | May act as receptor for class I MHC antigens                                                                                |
| LILRA3 | leukocyte immunoglobulin-like receptor           | 19 | - | 54797644  | 54809952  | 19q13.4 | May act as soluble receptor for class I MHC antigens                                                                        |
| LILRA5 | leukocyte immunoglobulin-like receptor subfamily | 19 | - | 51140227  | 51146290  | 19q13.4 | May plays a role in triggering innate immune responses. Seems not play a role for any class I MHC antigens recognition      |

**Table S10: regions excluded from CNV analyses (HG18 locations)**

**(A) Telomeric and centromeric regions  
(CNVs with >50% overlap with these regions were excluded)**

|                          |                           |
|--------------------------|---------------------------|
| <b>Telomeres</b>         | chr13:1-100000            |
| chr1:121100001-128000000 | chr14:1-100000            |
| chr2:91000001-95700000   | chr15:1-100000            |
| chr3:89400001-93200000   | chr16:1-100000            |
| chr4:48700001-52400000   | chr17:1-100000            |
| chr5:45800001-50500000   | chr18:1-100000            |
| chr6:58400001-63400000   | chr19:1-100000            |
| chr7:57400001-61100000   | chr20:1-100000            |
| chr8:43200001-48100000   | chr21:1-100000            |
| chr9:46700001-60300000   | chr22:1-100000            |
| chr10:38800001-42100000  | chrX:1-100000             |
| chr11:51400001-56400000  | chrY:1-100000             |
| chr12:33200001-36500000  | <b>Centromeres</b>        |
| chr13:13500001-18400000  | chr1:247149719-247249719  |
| chr14:13600001-19100000  | chr2:242851149-242951149  |
| chr15:14100001-18400000  | chr3:199401827-199501827  |
| chr16:34400001-40700000  | chr4:191173063-191273063  |
| chr17:22100001-23200000  | chr5:180757866-180857866  |
| chr18:15400001-17300000  | chr6:170799992-170899992  |
| chr19:26700001-30200000  | chr7:158721424-158821424  |
| chr20:25700001-28400000  | chr8:146174826-146274826  |
| chr21:10000001-13200000  | chr9:140173252-140273252  |
| chr22:9600001-16300000   | chr10:135274737-135374737 |
| chr1:1-100000            | chr11:134352384-134452384 |
| chr2:1-100000            | chr12:132249534-132349534 |
| chr3:1-100000            | chr13:114042980-114142980 |
| chr4:1-100000            | chr14:106268585-106368585 |
| chr5:1-100000            | chr15:100238915-100338915 |
| chr6:1-100000            | chr16:88727254-88827254   |
| chr7:1-100000            | chr17:78674742-78774742   |
| chr8:1-100000            | chr18:76017153-76117153   |
| chr9:1-100000            | chr19:63711651-63811651   |
| chr10:1-100000           | chr20:62335964-62435964   |
| chr11:1-100000           | chr21:46844323-46944323   |
| chr12:1-100000           | chr22:49591432-49691432   |

**(B) Regions containing immunoglobulin or olfactory receptor gene clusters  
(CNVs with any overlap with these regions were excluded)**

|                                         |                          |
|-----------------------------------------|--------------------------|
| <b>Olfactory receptor gene clusters</b> | chr5:180726893-180727832 |
| chr1:58953-611897                       | chr6:27987002-28033939   |
| chr1:156634935-157014049                | chr6:29119968-29664724   |
| chr1:157550083-157772421                | chr7:142433408-142460501 |
| chr1:245680953-246912228                | chr7:143263258-143458071 |
| chr3:99288706-99700165                  | chr7:143559936-143587654 |

chr7:143646150-143647083  
chr9:106306364-106497564  
chr9:124279057-124603173  
chr11:4345156-6177992  
chr11:6745813-6899801  
chr11:7774096-7917643  
chr11:48194937-56513894  
chr11:57547928-58032154  
chr11:58888507-59039906  
chr11:123129497-123946155  
chr12:53809819-54317884  
chr14:19285426-19781765  
chr14:21107773-21204078

chr15:19869939-19884787  
chr15:100163445-100280785  
chr17:2912712-3283885  
chr17:53587513-53602939  
chr19:9064920-9223739  
chr19:14770985-14914260  
chr19:15699833-15921768  
**Immunoglobulin gene clusters**  
chr2:88937989-89411302  
chr14:21159897-22090937  
chr14:105065301-106352275  
chr22:20715572-21595082

**(C) Additional regions excluded by QC analyses (see main text)  
(CNVs in these regions were excluded)**

chr1:137757137-137921433  
chr1:151493576-151503071  
chr4:69064675-69163188  
chr4:70164518-70246877  
chr4:161258794-161291569  
chr4:162099909-162103486  
chr5:32142841-32202977  
chr5:97073409-97127572  
chr5:104461415-104528155  
chr6:29775000-33225000  
chr6:44493419-44530667  
chr6:67075448-67105019  
chr6:79029649-79090197  
chr7:61060840-62060344  
chr7:101999689-102032517  
chr7:141401664-141441259  
chr8:5579321-5594564  
chr8:7808665-7830417  
chr8:39341981-39509376

chr8:115704806-115711712  
chr9:43515795-43730292  
chr10:20890630-20895015  
chr10:47197304-47211888  
chr11:81181640-81194909  
chr12:31149819-31302088  
chr13:56638784-56680301  
chr15:22125445-22288804  
chr15:32505886-32563312  
chr16:32310544-32474045  
chr16:32505196-32530051  
chr16:33744011-33820307  
chr16:54390068-54420550  
chr19:20413668-20507068  
chr19:32455280-32810457  
chr19:48383158-48498835  
chr20:52080333-52088118  
chr21:13391465-13425083  
chr22:22676385-22715105

**Supplementary author list:  
Schizophrenia Psychiatric Genome-Wide Association Study  
(GWAS) Consortium authors**

Stephan Ripke<sup>1</sup>, Alan R Sanders<sup>2,3</sup>, Kenneth S Kendler<sup>4-6</sup>, Douglas F Levinson<sup>7</sup>, Pamela Sklar<sup>1,8</sup>, Peter A Holmans<sup>9,10</sup>, Dan-Yu Lin<sup>11</sup>, Jubao Duan<sup>2,3</sup>, Roel A Ophoff<sup>12-15</sup>, Ole A Andreassen<sup>16,17</sup>, Edward Scolnick<sup>18</sup>, Sven Cichon<sup>19-21</sup>, David St. Clair<sup>22</sup>, Aiden Corvin<sup>23</sup>, Hugh Gurling<sup>24</sup>, Thomas Werge<sup>25</sup>, Dan Rujescu<sup>26</sup>, Douglas H R Blackwood<sup>27</sup>, Carlos N Pato<sup>28</sup>, Anil K Malhotra<sup>29-31</sup>, Shaun Purcell<sup>18</sup>, Frank Dudbridge<sup>32</sup>, Benjamin M Neale<sup>18</sup>, Lizzy Rossin<sup>1</sup>, Peter M Visscher<sup>33</sup>, Danielle Posthuma<sup>34,35</sup>, Douglas M Ruderfer<sup>1</sup>, Ayman Fanous<sup>5,36,37</sup>, Hreinn Stefansson<sup>38</sup>, Stacy Steinberg<sup>38</sup>, Bryan J Mowry<sup>39,40</sup>, Vera Golimbet<sup>41</sup>, Marc de Hert<sup>42</sup>, Erik G Jönsson<sup>43</sup>, István Bitter<sup>44</sup>, Olli P H Pietiläinen<sup>45,46</sup>, David A Collier<sup>47</sup>, Sarah Tosato<sup>48</sup>, Ingrid Agartz<sup>16,49</sup>, Margot Albus<sup>50</sup>, Madeline Alexander<sup>7</sup>, Richard L Amdur<sup>36,37</sup>, Farooq Amin<sup>51,52</sup>, Nicholas Bass<sup>24</sup>, Sarah E Bergen<sup>1</sup>, Donald W Black<sup>53</sup>, Anders D Børghlum<sup>54,55</sup>, Matthew A Brown<sup>56</sup>, Richard Bruggeman<sup>57</sup>, Nancy G Buccola<sup>58</sup>, William F Byerley<sup>59,60</sup>, Wiepke Cahn<sup>61</sup>, Rita M Cantor<sup>14,15</sup>, Vaughan J Carr<sup>62</sup>, Stanley V Catts<sup>63</sup>, Khalid Choudhury<sup>24</sup>, C Robert Cloninger<sup>64</sup>, Paul Cormican<sup>23</sup>, Nicholas Craddock<sup>9,10</sup>, Patrick A Danoy<sup>56</sup>, Susmita Datta<sup>24</sup>, Lieuwe de Haan<sup>65</sup>, Ditte Demontis<sup>54</sup>, Dimitris Dikeos<sup>66</sup>, Srdjan Djurovic<sup>16,67</sup>, Peter Donnelly<sup>68,69</sup>, Gary Donohoe<sup>23</sup>, Sarah Dwyer<sup>9,10</sup>, Robert Freedman<sup>71</sup>, Nelson B Freimer<sup>14</sup>, Marion Friedl<sup>26</sup>, Lyudmila Georgieva<sup>9,10</sup>, Ina Giegling<sup>26</sup>, Michael Gill<sup>23</sup>, Stephanie Godard<sup>73</sup>, Marian Hamshere<sup>9,10</sup>, Mark Hansen<sup>74</sup>, Thomas Hansen<sup>25</sup>, Annette M Hartmann<sup>26</sup>, Frans A Henskens<sup>75</sup>, David M Hougaard<sup>76</sup>, Christina M Hultman<sup>77</sup>, Louise K.E. Høffding<sup>25</sup>, Andrés Ingason<sup>25</sup>, Assen V Jablensky<sup>78</sup>, Maurice Jay<sup>79,132</sup>, René S Kahn<sup>61</sup>, Matthew C Keller<sup>81</sup>, Gunter Kenis<sup>82</sup>, Elaine Kenny<sup>23</sup>, Yunjung Kim<sup>83</sup>, George K Kirov<sup>9,10</sup>, Heike Konnerth<sup>26</sup>, Bettina Konte<sup>26</sup>, Lydia Krabbendam<sup>84</sup>, Robert Krasucki<sup>24</sup>, Virginia K Lasseter<sup>85,132</sup>, Claudine Laurent<sup>79</sup>, Jacob Lawrence<sup>24</sup>, Todd Lencz<sup>29-31</sup>, F Bernard Lerer<sup>86</sup>, Kung-Yee Liang<sup>87</sup>, Paul Lichtenstein<sup>77</sup>, Jeffrey A Lieberman<sup>88</sup>, Don H Linszen<sup>65</sup>, Jouko Lönnqvist<sup>89</sup>, Carmel M Loughland<sup>90</sup>, Alan W Maclean<sup>27</sup>, Brion S Maher<sup>4-6</sup>, Wolfgang Maier<sup>91</sup>, Jacques Mallet<sup>92</sup>, Pat Malloy<sup>27</sup>, Manuel Mattheisen<sup>19,21,93</sup>, Morten Mattingsdal<sup>16,94</sup>, Kevin A McGhee<sup>27</sup>, John J McGrath<sup>39,40</sup>, Andrew McIntosh<sup>27</sup>, Duncan E McLean<sup>95</sup>, Andrew McQuillin<sup>24</sup>, Ingrid Melle<sup>16,17</sup>, Patricia T Michie<sup>96,97</sup>, Vihra Milanova<sup>98</sup>, Derek W Morris<sup>23</sup>, Ole Mors<sup>55</sup>, Preben B Mortensen<sup>99</sup>, Valentina Moskvina<sup>9,10</sup>, Pierandrea Muglia<sup>100,101</sup>, Inez Myin-Germeys<sup>84</sup>, Deborah A Nertney<sup>39,40</sup>, Gerald Nestadt<sup>85</sup>, Ivan Nikolov<sup>9,10</sup>, Merete Nordentoft<sup>103</sup>, Nadine Norton<sup>9,10</sup>, Markus M Nöthen<sup>19,21</sup>, Colm T O'Dushlaine<sup>23</sup>, Ann Olincy<sup>71</sup>, Line Olsen<sup>25</sup>, F Anthony O'Neill<sup>104</sup>, Torben F Ørntoft<sup>105,106</sup>, Michael J Owen<sup>9,10</sup>, Christos Pantelis<sup>107</sup>, George Papadimitriou<sup>66</sup>, Michele T Pato<sup>28</sup>, Leena Peltonen<sup>45, 46, 108, 132</sup>, Hannes Petursson<sup>109</sup>, Ben Pickard<sup>110</sup>, Jonathan Pimm<sup>24</sup>, Ann E Pulver<sup>85</sup>, Vinay Puri<sup>24</sup>, Digby Quested<sup>111</sup>, Emma M Quinn<sup>23</sup>, János M Réthelyi<sup>44</sup>, Robert Ribble<sup>4-6</sup>, Marcella Rietschel<sup>91, 112</sup>, Brien P Riley<sup>4-6</sup>, Anders Rosengren<sup>25</sup>, Mirella Ruggeri<sup>48</sup>, Ulrich Schall<sup>97, 113</sup>, Thomas G Schulze<sup>112,114</sup>, Sibylle G Schwab<sup>115-117</sup>, Henriette Schmock<sup>25</sup>, Rodney J Scott<sup>118</sup>, Jianxin Shi<sup>119</sup>, Engilbert Sigurdsson<sup>109, 120</sup>, Jeremy M Silverman<sup>8, 121</sup>, Celina Skjoldt<sup>25</sup>, Chris C A Spencer<sup>68</sup>, Kari Stefansson<sup>38</sup>, Amy Strange<sup>68</sup>, Eric Strengman<sup>12,13</sup>, T Scott Stroup<sup>88</sup>, Jaana Suvisaari<sup>89</sup>, Lars Terenius<sup>43</sup>, Srinivasa Thirumalai<sup>122</sup>, Johan H Thygesen<sup>25</sup>, Draga Toncheva<sup>124</sup>, Edwin van den Oord<sup>125</sup>, Jim van Os<sup>84</sup>, Ruud van Winkel<sup>42,82</sup>, Jan Veldink<sup>126</sup>, Dermot Walsh<sup>127</sup>, Durk Wiersma<sup>57</sup>, Dieter B Wildenauer<sup>115,129</sup>, Hywel J Williams<sup>9,10</sup>, Nigel M Williams<sup>9,10</sup>, Brandon Wormley<sup>4-6</sup>, Stan Zammit<sup>9,10</sup>, Patrick F Sullivan<sup>77,83,130,131</sup>, Michael C O'Donovan<sup>9,10</sup>, Mark J Daly<sup>1</sup> & Pablo V Gejman<sup>2,3</sup>

<sup>1</sup>Center for Human Genetic Research, Massachusetts General Hospital, Boston, Massachusetts, USA. <sup>2</sup>Department of Psychiatry and Behavioral Sciences, NorthShore University HealthSystem, Evanston, Illinois, USA. <sup>3</sup>Department of Psychiatry and Behavioral Sciences, University of Chicago, Chicago, Illinois, USA. <sup>4</sup>Virginia Institute for Psychiatric and Behavioral Genetics, Virginia Commonwealth University School of Medicine, Richmond, Virginia, USA. <sup>5</sup>Department of Psychiatry, Virginia Commonwealth University School of Medicine, Richmond, Virginia, USA.

<sup>6</sup>Department of Human and Molecular Genetics, Virginia Commonwealth University School of Medicine, Richmond, Virginia, USA. <sup>7</sup>Department of Psychiatry and Behavioral Sciences, Stanford University, Stanford, California, USA. <sup>8</sup>Department of Psychiatry, Mount Sinai School of Medicine, New York, New York, USA. <sup>9</sup>Medical Research Council (MRC) Centre for Neuropsychiatric Genetics and Genomics, School of Medicine, Cardiff University, Cardiff, UK. <sup>10</sup>Department of Psychological Medicine and Neurology, School of Medicine, Cardiff University, Cardiff, UK. <sup>11</sup>Department of Biostatistics, University of North Carolina, Chapel Hill, North Carolina, USA. <sup>12</sup>Department of Medical Genetics, University Medical Center Utrecht, Utrecht, The Netherlands. <sup>13</sup>Rudolf Magnus Institute of Neuroscience, University Medical Center Utrecht, Utrecht, The Netherlands. <sup>14</sup>University of California at Los Angeles (UCLA) Center for Neurobehavioral Genetics, University of California at Los Angeles, Los Angeles, California, USA. <sup>15</sup>Department of Human Genetics, University of California at Los Angeles, Los Angeles, California, USA. <sup>16</sup>Psychiatry Section, Institute of Clinical Medicine, University of Oslo, Oslo, Norway. <sup>17</sup>Department of Psychiatry, Oslo University Hospital, Oslo, Norway. <sup>18</sup>Broad Institute, Cambridge, Massachusetts, USA. <sup>19</sup>Department of Genomics, Life and Brain Center, University of Bonn, Bonn, Germany. <sup>20</sup>Institute of Neuroscience and Medicine (INM-1), Research Center Juelich, Juelich, Germany. <sup>21</sup>Institute of Human Genetics, University of Bonn, Bonn, Germany. <sup>22</sup>Institute of Medical Sciences, University of Aberdeen, Foresterhill, Aberdeen, UK. <sup>23</sup>Neuropsychiatric Genetics Research Group, Trinity College Dublin, Dublin, Ireland. <sup>24</sup>Molecular Psychiatry Laboratory, Research Department of Mental Health Sciences, University College London Medical School, Windeyer Institute of Medical Sciences, London, UK. <sup>25</sup>Institute of Biological Psychiatry, Mental Health Center (MHC) Sct. Hans, Copenhagen University Hospital, Roskilde, Denmark. <sup>26</sup>Molecular and Clinical Neurobiology, Department of Psychiatry, Ludwig-Maximilians-University, Munich, Germany. <sup>27</sup>Division of Psychiatry, University of Edinburgh, Royal Edinburgh Hospital, Edinburgh, UK. <sup>28</sup>Keck School of Medicine, University of Southern California, Los Angeles, California, USA. <sup>29</sup>Department of Psychiatry, Division of Research, The Zucker Hillside Hospital Division of the North Shore-Long Island Jewish Health System, Glen Oaks, New York, USA. <sup>30</sup>Center for Psychiatric Neuroscience, The Feinstein Institute for Medical Research, Manhasset, New York, USA. <sup>31</sup>Department of Psychiatry and Behavioral Science, Albert Einstein College of Medicine of Yeshiva University, New York, New York, USA. <sup>32</sup>Department of Non-Communicable Disease Epidemiology, London School of Hygiene and Tropical Medicine, London, UK. <sup>33</sup>Queensland Statistical Genetics Laboratory, Queensland Institute of Medical Research, Brisbane, Queensland, Australia. <sup>34</sup>Vrije Universiteit (VU), Center for Neurogenomics and Cognitive Research (CNCR), Department of Functional Genomics, Amsterdam, The Netherlands. <sup>35</sup>VU Medical Centre, Department of Medical Genomics, Amsterdam, The Netherlands. <sup>36</sup>Washington Veteran's Affairs Medical Center, Washington, DC, USA. <sup>37</sup>Department of Psychiatry, Georgetown University School of Medicine, Washington, DC, USA. <sup>38</sup>deCODE Genetics, Reykjavik, Iceland. <sup>39</sup>Queensland Brain Institute, University of Queensland, Brisbane, Queensland, Australia. <sup>40</sup>Queensland Centre for Mental Health Research, University of Queensland, Brisbane, Queensland, Australia. <sup>41</sup>Mental Health Research Center, Russian Academy of Medical Sciences, Moscow, Russia. <sup>42</sup>University Psychiatric Centre, Catholic University Leuven, Kortenberg, Belgium. <sup>43</sup>Department of Clinical Neuroscience, Human Brain Informatics (HUBIN) Project, Karolinska Institutet and Hospital, Stockholm, Sweden. <sup>44</sup>Semmelweis University, Department of Psychiatry and Psychotherapy, Budapest, Hungary. <sup>45</sup>Institute for Molecular Medicine Finland (FIMM), University of Helsinki, Helsinki, Finland. <sup>46</sup>Department of Medical Genetics, University of Helsinki, Helsinki, Finland. <sup>47</sup>Social, Genetic and Developmental Psychiatry Centre, Institute of Psychiatry, King's College, London, UK. <sup>48</sup>Section of Psychiatry and Clinical Psychology, University of Verona, Verona, Italy. <sup>49</sup>Department of Research, Diakonhjemmet Hospital, Oslo, Norway. <sup>50</sup>State Mental Hospital, Haar, Germany. <sup>51</sup>Department of Psychiatry and Behavioral Sciences, Emory University, Atlanta, Georgia, USA. <sup>52</sup>Department of Psychiatry and Behavioral Sciences, Atlanta Veterans Affairs Medical Center, Atlanta, Georgia, USA. <sup>53</sup>Department of Psychiatry, University of Iowa Carver College of

Medicine, Iowa City, Iowa, USA. <sup>54</sup>Institute of Human Genetics, University of Aarhus, Aarhus, Denmark. <sup>55</sup>Centre for Psychiatric Research, Aarhus University Hospital, Risskov, Denmark. <sup>56</sup>University of Queensland Diamantina Institute, Princess Alexandra Hospital, University of Queensland, Brisbane, Queensland, Australia. <sup>57</sup>University Medical Center Groningen, Department of Psychiatry, University of Groningen, Groningen, The Netherlands. <sup>58</sup>School of Nursing, Louisiana State University Health Sciences Center, New Orleans, Louisiana, USA. <sup>59</sup>Department of Psychiatry, University of California at San Francisco, San Francisco, California, USA. <sup>60</sup>NCIRE (Northern California Institute for Research and Education), San Francisco, California, USA. <sup>61</sup>Department of Psychiatry, Rudolf Magnus Institute of Neuroscience, University Medical Center Utrecht, Utrecht, The Netherlands. <sup>62</sup>School of Psychiatry, University of New South Wales and Schizophrenia Research Institute, Sydney, New South Wales, Australia. <sup>63</sup>Department of Psychiatry, University of Queensland, Royal Brisbane Hospital, Brisbane, Australia. <sup>64</sup>Department of Psychiatry, Washington University, St. Louis, Missouri, USA. <sup>65</sup>Academic Medical Centre, University of Amsterdam, Department of Psychiatry, Amsterdam, The Netherlands. <sup>66</sup>Department of Psychiatry, University of Athens Medical School, Athens, Greece. <sup>67</sup>Department of Medical Genetics, Oslo University Hospital, Oslo, Norway. <sup>68</sup>Wellcome Trust Centre for Human Genetics, Oxford, UK. <sup>69</sup>Department of Statistics, University of Oxford, Oxford, UK. <sup>71</sup>Department of Psychiatry, University of Colorado Denver, Aurora, Colorado, USA. <sup>73</sup>INSERM, Institut de Myologie, Hôpital de la Pitié-Salpêtrière, Paris, France. <sup>74</sup>Illumina, Inc., La Jolla, California, USA. <sup>75</sup>School of Electrical Engineering and Computing Science, University of Newcastle, Newcastle, New South Wales, Australia. <sup>76</sup>Section of Neonatal Screening and Hormones, Department of Clinical Chemistry and Immunology, The State Serum Institute, Copenhagen, Denmark. <sup>77</sup>Department of Medical Epidemiology and Biostatistics, Karolinska Institutet, Stockholm, Sweden. <sup>78</sup>Centre for Clinical Research in Neuropsychiatry, School of Psychiatry and Clinical Neurosciences, The University of Western Australia, Perth, Western Australia, Australia. <sup>79</sup>Department of Child and Adolescent Psychiatry, Pierre and Marie Curie Faculty of Medicine, Paris, France. <sup>81</sup>Department of Psychology, University of Colorado, Boulder, Boulder, Colorado, USA. <sup>82</sup>Department of Psychiatry and Psychology, School of Mental Health and Neuroscience, European Graduate School of Neuroscience (EURON), South Limburg Mental Health Research and Teaching Network (SEARCH), Maastricht University Medical Centre, Maastricht, The Netherlands. <sup>83</sup>Department of Genetics, University of North Carolina at Chapel Hill, Chapel Hill, North Carolina, USA. <sup>84</sup>Maastricht University Medical Centre, South Limburg Mental Health Research and Teaching Network, Maastricht, The Netherlands. <sup>85</sup>Department of Psychiatry and Behavioral Sciences, Johns Hopkins University School of Medicine, Baltimore, Maryland, USA. <sup>86</sup>Department of Psychiatry, Hadassah-Hebrew University Medical Center, Jerusalem, Israel. <sup>87</sup>Department of Biostatistics, Johns Hopkins University Bloomberg School of Public Health, Baltimore, Maryland, USA. <sup>88</sup>Department of Psychiatry, Columbia University, New York, New York, USA. <sup>89</sup>Department of Mental Health and Substance Abuse Services, National Institute for Health and Welfare, Helsinki, Finland. <sup>90</sup>Schizophrenia Research Institute, Sydney and Centre for Brain and Mental Health Research, University of Newcastle, Newcastle, New South Wales, Australia. <sup>91</sup>Department of Psychiatry, University of Bonn, Bonn, Germany. <sup>92</sup>Laboratoire de Génétique Moléculaire de la Neurotransmission et des Processus Neurodégénératifs, Centre National de la Recherche Scientifique, Hôpital de la Pitié Salpêtrière, Paris, France. <sup>93</sup>Institute of Medical Biometry, Informatics and Epidemiology (IMBIE), University of Bonn, Bonn, Germany. <sup>94</sup>Department of Research, Sørlandet Hospital, Kristiansand, Norway. <sup>95</sup>Queensland Centre for Mental Health Research, The Park Centre for Mental Health, Wacol, Queensland, Australia. <sup>96</sup>Functional NeuroImaging Laboratory, School of Psychology, University of Newcastle, Sydney, New South Wales, Australia. <sup>97</sup>Schizophrenia Research Institute, Sydney, New South Wales, Australia. <sup>98</sup>Department of Psychiatry, First Psychiatric Clinic, Alexander University Hospital, Sofia, Bulgaria. <sup>99</sup>National Centre for Register-Based Research, University of Aarhus, Aarhus, Denmark. <sup>100</sup>Department of Psychiatry, University of Toronto, Toronto, Canada. <sup>101</sup>NeuroSearch A/S, Ballerup, Denmark. <sup>103</sup>Psychiatric Centre Copenhagen, Copenhagen

University Hospital, Copenhagen, Denmark. <sup>104</sup>Department of Psychiatry, Queens University, Belfast, Ireland. <sup>105</sup>ARoS Applied Biotechnology A/S, Skejby, Denmark. <sup>106</sup>Department of Molecular Medicine, Aarhus University Hospital, Skejby, Denmark. <sup>107</sup>Melbourne Neuropsychiatry Centre, Department of Psychiatry, The University of Melbourne and Melbourne Health, Melbourne, Victoria, Australia. <sup>108</sup>Wellcome Trust Sanger Institute, Wellcome Trust Genome Campus, Hinxton, Cambridge, UK. <sup>109</sup>Department of Psychiatry, National University Hospital, Reykjavik, Iceland. <sup>110</sup>Strathclyde Institute of Pharmacy and Biomedical Sciences, The John Arbuthnott Building, University of Strathclyde, Glasgow, UK. <sup>111</sup>Department of Psychiatry, University of Oxford, Warneford Hospital, Headington, Oxford, UK. <sup>112</sup>Department of Genetic Epidemiology in Psychiatry, Central Institute of Mental Health, University of Heidelberg, Mannheim, Germany. <sup>113</sup>Priority Centre for Brain and Mental Health Research, University of Newcastle, Sydney, New South Wales, Australia. <sup>114</sup>Department of Psychiatry and Psychotherapy, Georg-August-University, Göttingen, Germany. <sup>115</sup>School of Psychiatry and Clinical Neurosciences, University of Western Australia, Perth, Western Australia, Australia. <sup>116</sup>Department of Psychiatry, University of Erlangen-Nuremberg, Erlangen, Germany. <sup>117</sup>Centre for Medical Research, Western Australian Institute for Medical Research, University of Western Australia, Perth, Western Australia, Australia. <sup>118</sup>Centre for Information Based Medicine, University of Newcastle, Hunter Medical Research Institute, Newcastle and Schizophrenia Research Institute, Sydney, New South Wales, Australia. <sup>119</sup>Division of Cancer Epidemiology and Genetics, National Cancer Institute, Bethesda, Maryland, USA. <sup>120</sup>Department of Psychiatry, University of Iceland, Reykjavik, Iceland. <sup>121</sup>Department of Psychiatry, Veterans Affairs Medical Center, New York, New York, USA. <sup>122</sup>West Berkshire National Health Service (NHS) Trust, Reading, UK. <sup>124</sup>Department of Medical Genetics, University Hospital Maichin Dom, Sofia, Bulgaria. <sup>125</sup>Department of Pharmacy, Virginia Commonwealth University, Richmond, Virginia, USA. <sup>126</sup>Rudolf Magnus Institute of Neuroscience, Department of Neurology, Universitair Medisch Centrum (UMC) Utrecht, Utrecht, The Netherlands. <sup>127</sup>The Health Research Board, Dublin, Ireland. <sup>129</sup>Centre for Clinical Research in Neuropsychiatry, Graylands Hospital, Mt Claremont, Western Australia, Australia. <sup>130</sup>Department of Psychiatry, University of North Carolina at Chapel Hill, Chapel Hill, North Carolina, USA. <sup>131</sup>Department of Epidemiology, University of North Carolina at Chapel Hill, Chapel Hill, North Carolina, USA. <sup>132</sup>

## Supplementary References

1. Price AL, Patterson NJ, Plenge RM, Weinblatt ME, Shadick NA, Reich D: Principal components analysis corrects for stratification in genome-wide association studies. *Nat Genet* 2006; 38(8):904-909
2. Ge D, Zhang K, Need AC, Martin O, Fellay J, Urban TJ, Telenti A, Goldstein DB: WGAViewer: software for genomic annotation of whole genome association studies. *Genome Res* 2008; 18(4):640-3
3. Ripke S, Sanders AR, Kendler KS, et al.: Genome-wide association study identifies five new schizophrenia loci. *Nat Genet* 2011; 43(10):969-76
4. Holmans P, Green EK, Pahwa JS, Ferreira MA, Purcell SM, Sklar P, Owen MJ, O'Donovan MC, Craddock N: Gene ontology analysis of GWA study data sets provides insights into the biology of bipolar disorder. *Am J Hum Genet* 2009; 85(1):13-24
5. Kirov G, Rujescu D, Ingason A, Collier DA, O'Donovan MC, Owen MJ: Neurexin 1 (NRXN1) deletions in schizophrenia. *Schizophr Bull* 2009; 35(5):851-4
6. Levinson DF, Duan J, Oh S, Wang K, Sanders AR, Shi J, Zhang N, Mowry BJ, Olincy A, Amin F, Cloninger CR, Silverman JM, Buccola NG, Byerley WF, Black DW, Kendler KS, Freedman R, Dudbridge F, Pe'er I, Hakonarson H, Bergen SE, Fanous AH, Holmans PA, Gejman PV: Copy Number Variants in Schizophrenia: Confirmation of Five Previous Findings and New Evidence for 3q29 Microdeletions and VIPR2 Duplications. *Am J Psychiatry* 2011; 168(3):302-16
7. Boulanger LM: Immune proteins in brain development and synaptic plasticity. *Neuron* 2009; 64(1):93-109
8. International Schizophrenia Consortium: Rare chromosomal deletions and duplications increase risk of schizophrenia. *Nature* 2008; 455(7210):237-41
9. Walsh T, McClellan JM, McCarthy SE, Addington AM, Pierce SB, Cooper GM, Nord AS, Kusenda M, Malhotra D, Bhandari A, Stray SM, Rippey CF, Roccanova P, Makarov V, Lakshmi B, Findling RL, Sikich L, Stromberg T, Merriman B, Gogtay N, Butler P, Eckstrand K, Noory L, Gochman P, Long R, Chen Z, Davis S, Baker C, Eichler EE, Meltzer PS, Nelson SF, Singleton AB, Lee MK, Rapoport JL, King MC, Sebat J: Rare structural variants disrupt multiple genes in neurodevelopmental pathways in schizophrenia. *Science* 2008; 320(5875):539-43
10. Xu B, Woodroffe A, Rodriguez-Murillo L, Roos JL, van Rensburg EJ, Abecasis GR, Gogos JA, Karayiorgou M: Elucidating the genetic architecture of familial schizophrenia using rare copy number variant and linkage scans. *Proc Natl Acad Sci U S A* 2009; 106(39):16746-51
11. Lai TL, Xing H, Zhang N: Stochastic segmentation models for array-based comparative genomic hybridization data analysis. *Biostatistics* 2008; 9(2):290-307
12. Purcell S, Neale B, Todd-Brown K, Thomas L, Ferreira MA, Bender D, Maller J, Sklar P, de Bakker PI, Daly MJ, Sham PC: PLINK: a tool set for whole-genome association and population-based linkage analyses. *Am J Hum Genet* 2007; 81(3):559-75
